# Supplementary material for: A versatile, divergent route for the synthesis of ABAC tetraazaporphyrins: molecularly engineered, push–pull phthalocyanine-type dyes
Source: Royal Society of Chemistry journal article supplement (doi:10.1039/d1tc00990g), 2021-01-01

## SUPPORTING INFORMATION

### **A versatile, divergent route for the synthesis of ABAC tetraazaporphyrins, molecularly engineered, push-pull phthalocyanine-type dyes**

Emre Güzel,<sup>a,b</sup> Diana-Paola Medina,<sup>a</sup> María Medel,<sup>a</sup> Mehmet Kandaz,<sup>†,a,c</sup> Tomás Torres,<sup>\*a,d,e</sup> and M. Salomé Rodríguez-Morgade<sup>\*,a,e</sup>

## Table of Contents

|                                                                                             |    |
|---------------------------------------------------------------------------------------------|----|
| <b>Copies of Spectra</b> .....                                                              | 4  |
| <b>Figure S1.</b> <sup>1</sup> H-NMR spectrum of <b>3</b> in THF-d <sub>4</sub> .....       | 4  |
| <b>Figure S2.</b> <sup>13</sup> C-NMR spectrum of <b>3</b> in THF-d <sub>4</sub> .....      | 5  |
| <b>Figure S3.</b> IR Spectrum (KBr) of <b>3</b> .....                                       | 6  |
| <b>Figure S4.</b> UV-Vis Spectrum of <b>3</b> in THF.....                                   | 6  |
| <b>Figure S5.</b> MS (MALDI-TOF, DCTB) of <b>3</b> .....                                    | 7  |
| <b>Figure S6.</b> HRMS (MALDI-TOF, DCTB+ PPGNa 790) of <b>3</b> .....                       | 8  |
| <b>Figure S7.</b> <sup>1</sup> H-NMR spectrum of <b>4</b> in THF-d <sub>4</sub> .....       | 9  |
| <b>Figure S8.</b> FTIR Spectrum (KBr) of <b>4</b> .....                                     | 10 |
| <b>Figure S9.</b> UV-Vis Spectrum in THF of <b>4</b> .....                                  | 10 |
| <b>Figure S10.</b> MS (MALDI-TOF, DCTB) of <b>4</b> .....                                   | 11 |
| <b>Figure S11.</b> <sup>1</sup> H-NMR spectrum of <b>5</b> in THF-d <sub>4</sub> .....      | 12 |
| <b>Figure S12.</b> FTIR Spectrum (KBr) of <b>5</b> .....                                    | 13 |
| <b>Figure S13.</b> UV/Vis Spectrum in THF of <b>5</b> .....                                 | 13 |
| <b>Figure S14.</b> MS (MALDI-TOF, DCTB) of <b>5</b> .....                                   | 14 |
| <b>Figure S15.</b> <sup>13</sup> C-NMR spectrum of <b>6</b> in CDCl <sub>3</sub> .....      | 15 |
| <b>Figure S16.</b> FT-IR (KBr) spectrum of <b>6</b> .....                                   | 16 |
| <b>Figure S17.</b> UV-Vis of <b>6</b> in CHCl <sub>3</sub> .....                            | 16 |
| <b>Figure S18.</b> HRMS (APCI <sup>+</sup> ) of <b>6</b> .....                              | 17 |
| <b>Figure S19.</b> <sup>1</sup> H-NMR spectrum of <b>7</b> in CDCl <sub>3</sub> .....       | 18 |
| <b>Figure S20.</b> UV-Vis of <b>7</b> in CHCl <sub>3</sub> .....                            | 19 |
| <b>Figure S21.</b> HRMS (APCI <sup>+</sup> ) of <b>7</b> .....                              | 19 |
| <b>Figure S22.</b> <sup>1</sup> H-NMR spectrum of <b>9</b> in CDCl <sub>3</sub> .....       | 20 |
| <b>Figure S23.</b> DEPT <sup>13</sup> C-NMR spectrum of <b>9</b> in CDCl <sub>3</sub> ..... | 21 |
| <b>Figure S24.</b> FT-IR (KBr) spectrum of <b>9</b> .....                                   | 21 |

|                                                                                        |    |
|----------------------------------------------------------------------------------------|----|
| <b>Figure S25.</b> UV-Vis of <b>9</b> in CHCl <sub>3</sub> .....                       | 22 |
| <b>Figure S26.</b> MS (MALDI-TOF, DCTB) of <b>9</b> .....                              | 23 |
| <b>Figure S27.</b> HRMS (DCTB + PEGNa 1500) of <b>9</b> .....                          | 24 |
| <b>Figure S28.</b> <sup>1</sup> H-NMR spectrum of <b>11</b> in CDCl <sub>3</sub> ..... | 25 |
| <b>Figure S29.</b> UV-Vis of <b>11</b> in CHCl <sub>3</sub> .....                      | 26 |
| <b>Figure S30.</b> MS (MALDI-TOF, DCTB) of <b>11</b> .....                             | 27 |
| <b>Figure S31.</b> FT-IR spectrum of <b>12</b> in KBr.....                             | 28 |
| <b>Figure S32.</b> UV-Vis Spectrum of <b>12</b> in CHCl <sub>3</sub> .....             | 29 |
| <b>Figure S33.</b> MS (MALDI-TOF, DCTB) of <b>12</b> .....                             | 30 |
| <b>Figure S34.</b> HRMS (MALDI-TOF, DCTB + PPG2000) of <b>12</b> .....                 | 31 |

## Copies of Spectra

Zn(II) [2,3-12,13-bis(benzo-4'(5')-iodo)-7,8,17,18-tetrapropyl-porphyrinato] (**3**)

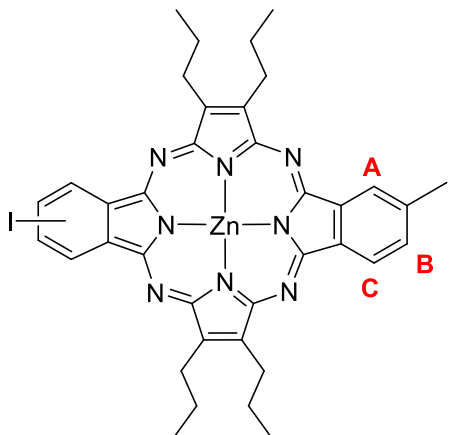

Figure S1.  $^1\text{H-NMR}$  spectrum of **3** in  $\text{THF-d}_4$ .

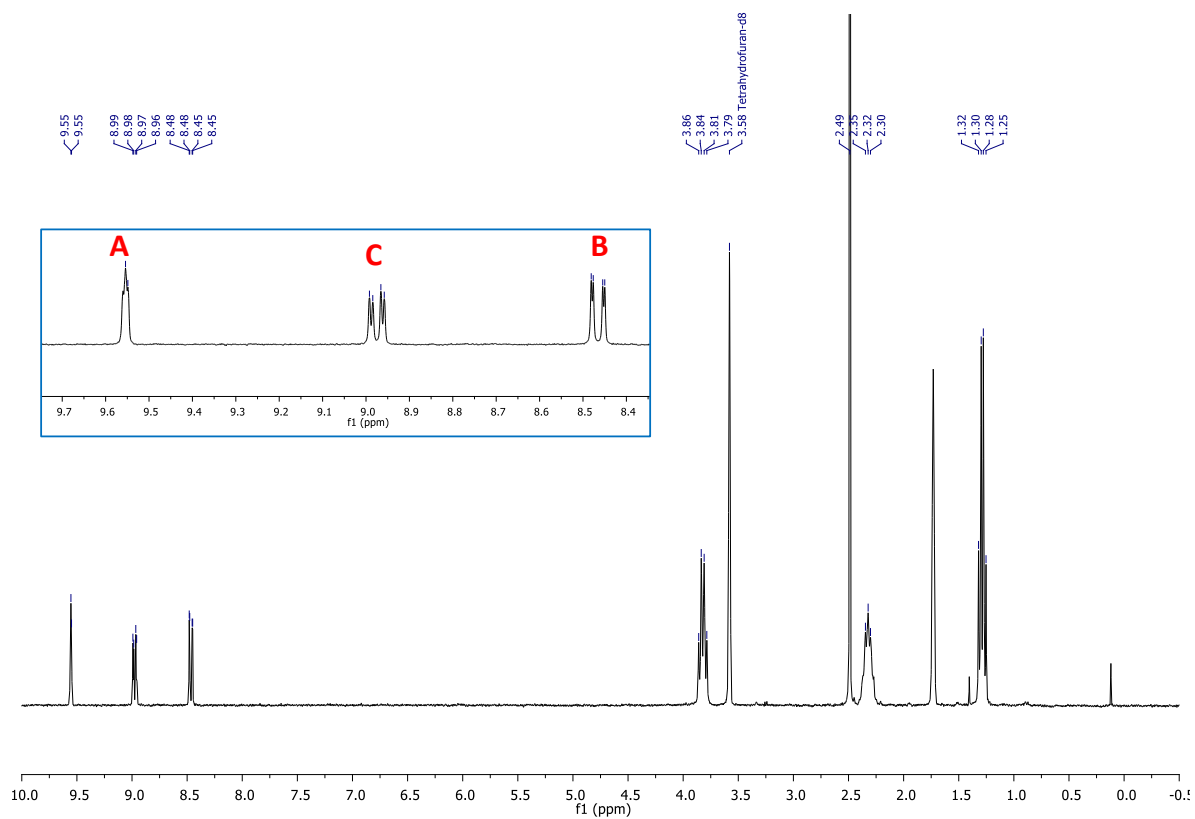

**Figure S2.**  $^{13}\text{C}$ -NMR spectrum of **3** in THF- $d_4$ .

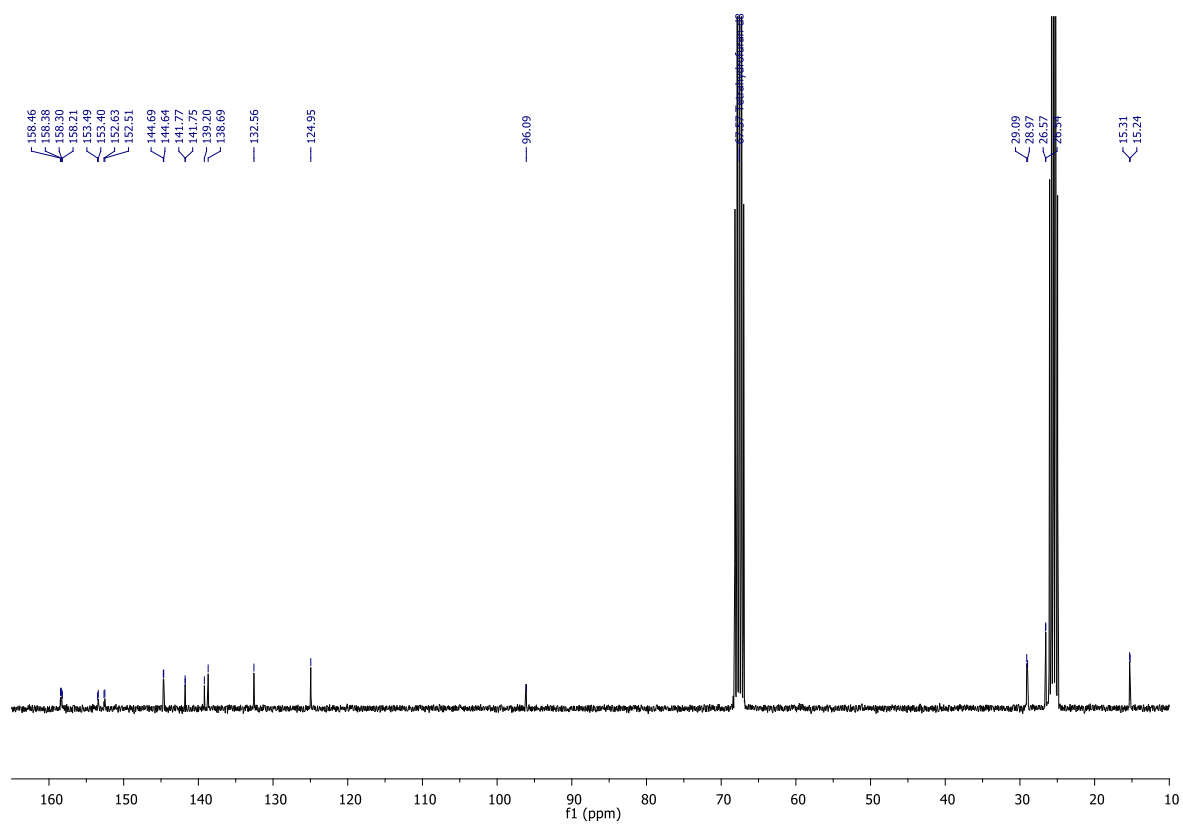

Figure S3. IR Spectrum (KBr) of **3**

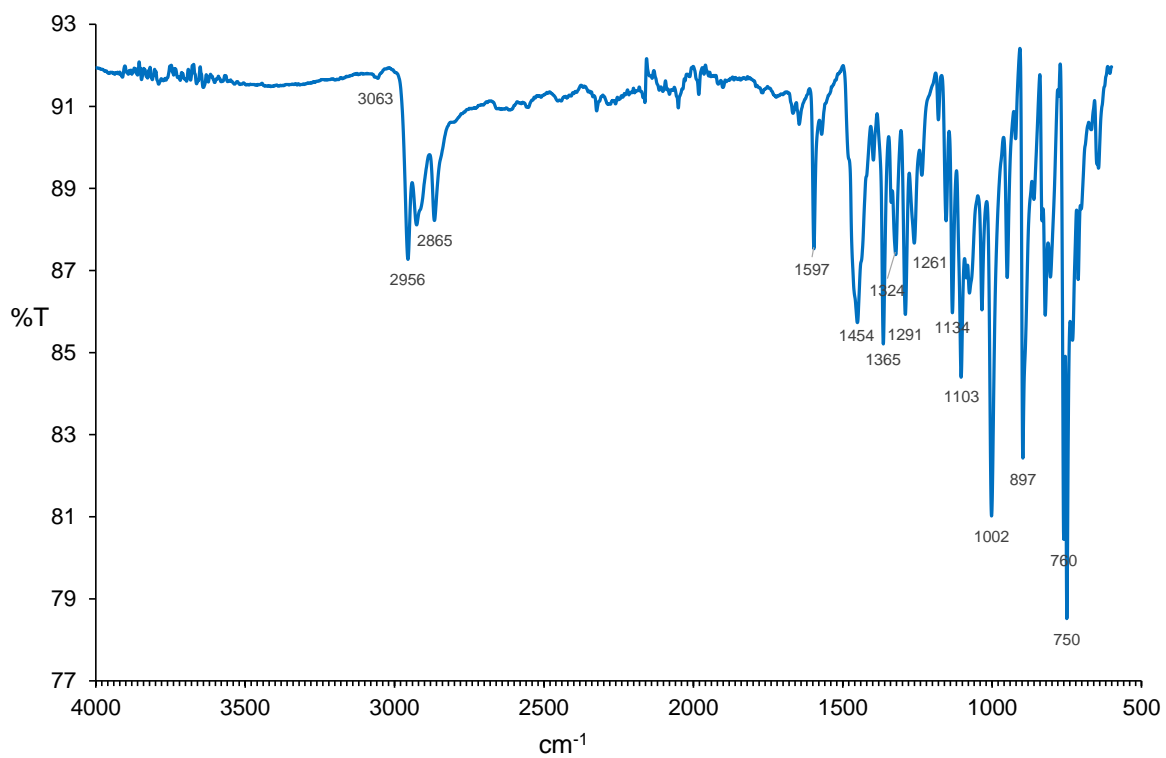

Figure S4. UV-Vis Spectrum of **3** in THF

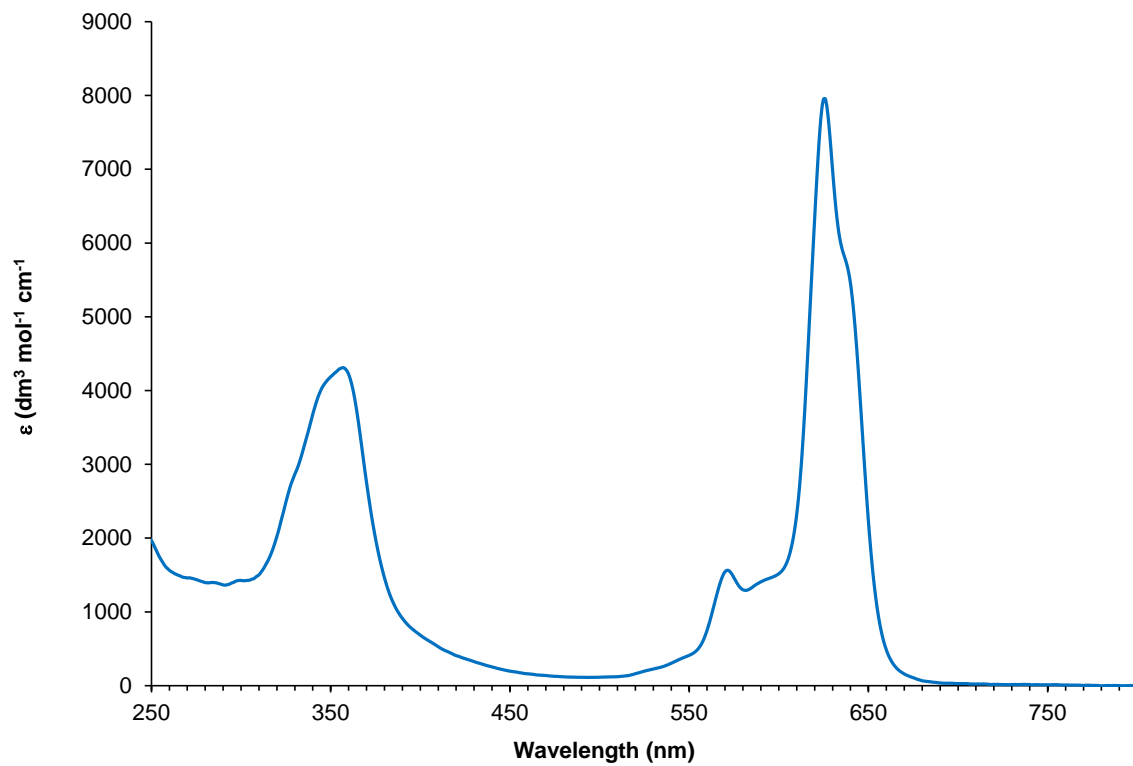

**Figure S5.** MS (MALDI-TOF, DCTB) of **3**.

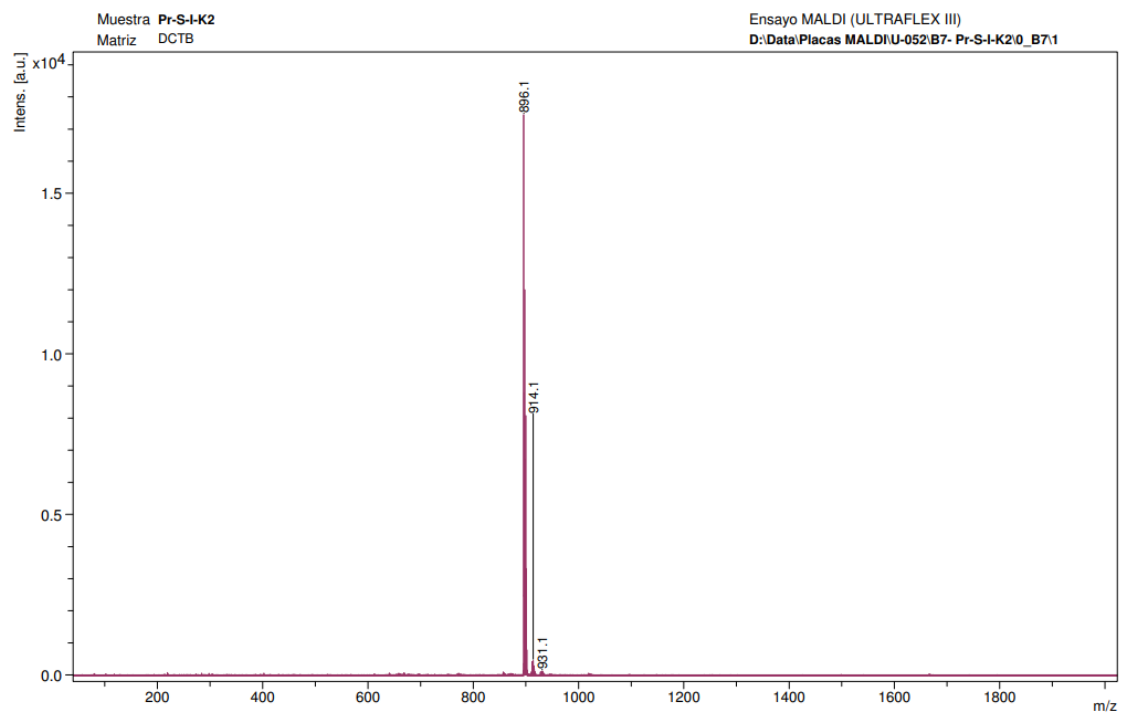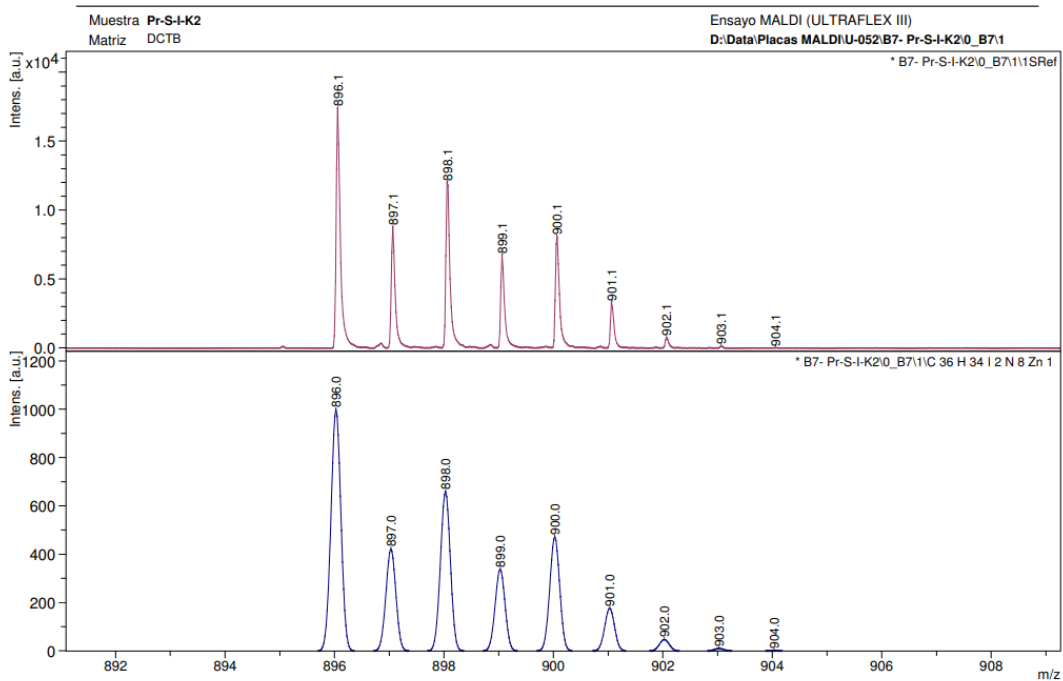

**Figure S6.** HRMS (MALDI-TOF, DCTB+ PPGNa 790) of **3**.

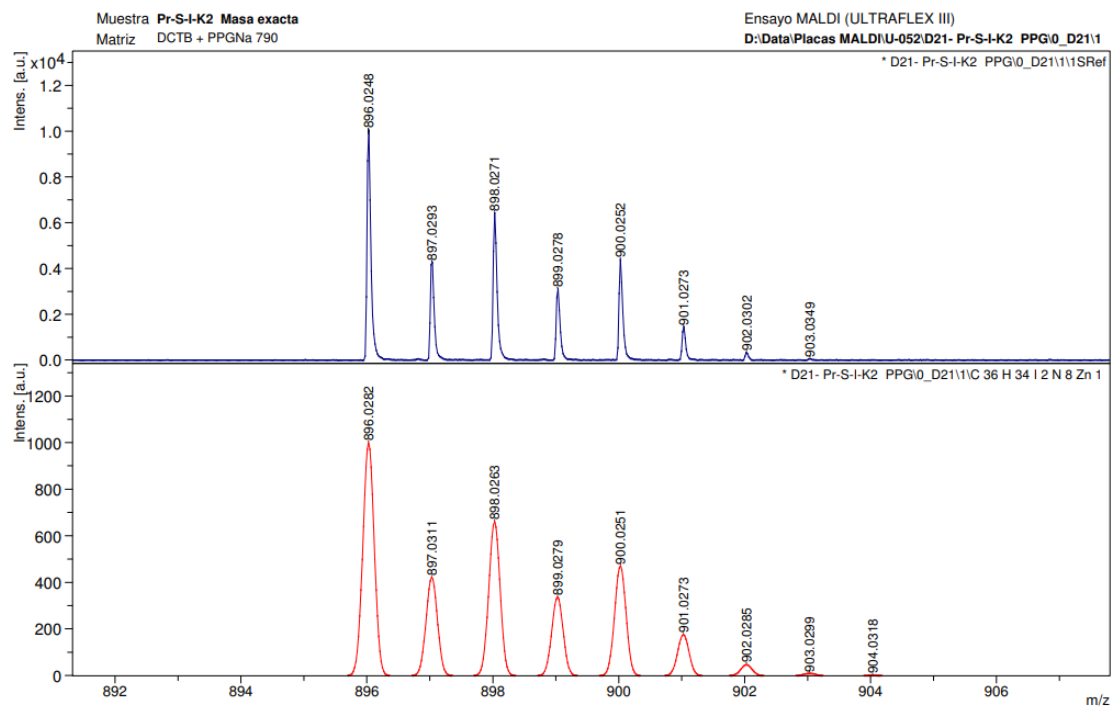



Zn(II) [2,3(benzo-4'-iodo)-12,13-benzo-7,8,17,18-tetrapropyl-porphyrinato] (4)

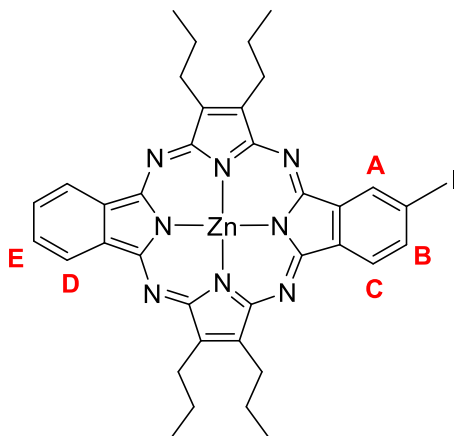

Figure S7.  $^1\text{H-NMR}$  spectrum of **4** in  $\text{THF-d}_4$ .

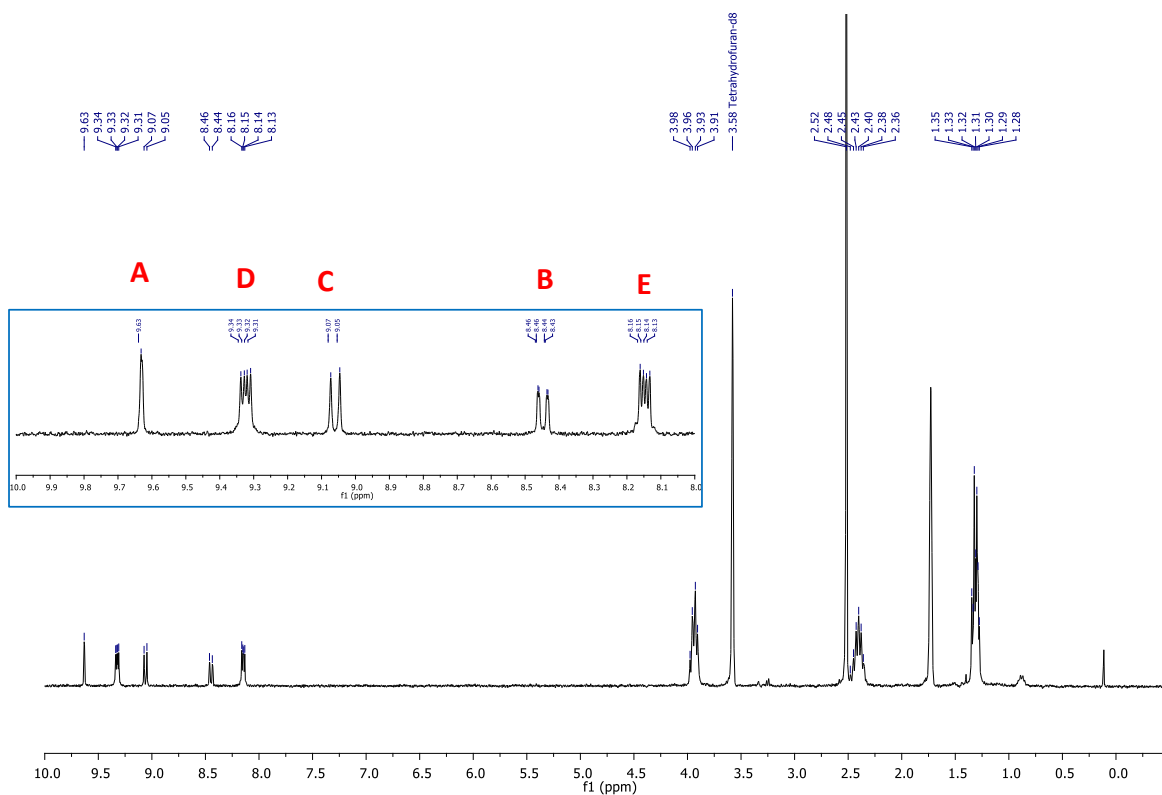

**Figure S8.** FTIR Spectrum (KBr) of **4**

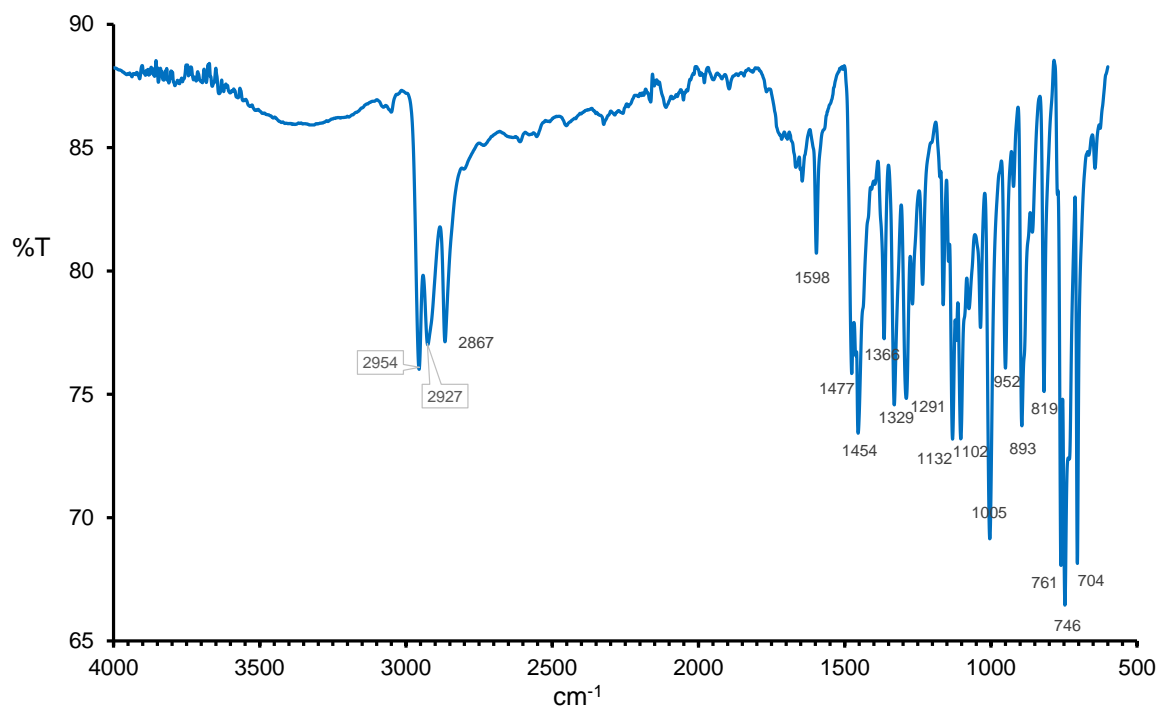

**Figure S9.** UV-Vis Spectrum in THF of **4**

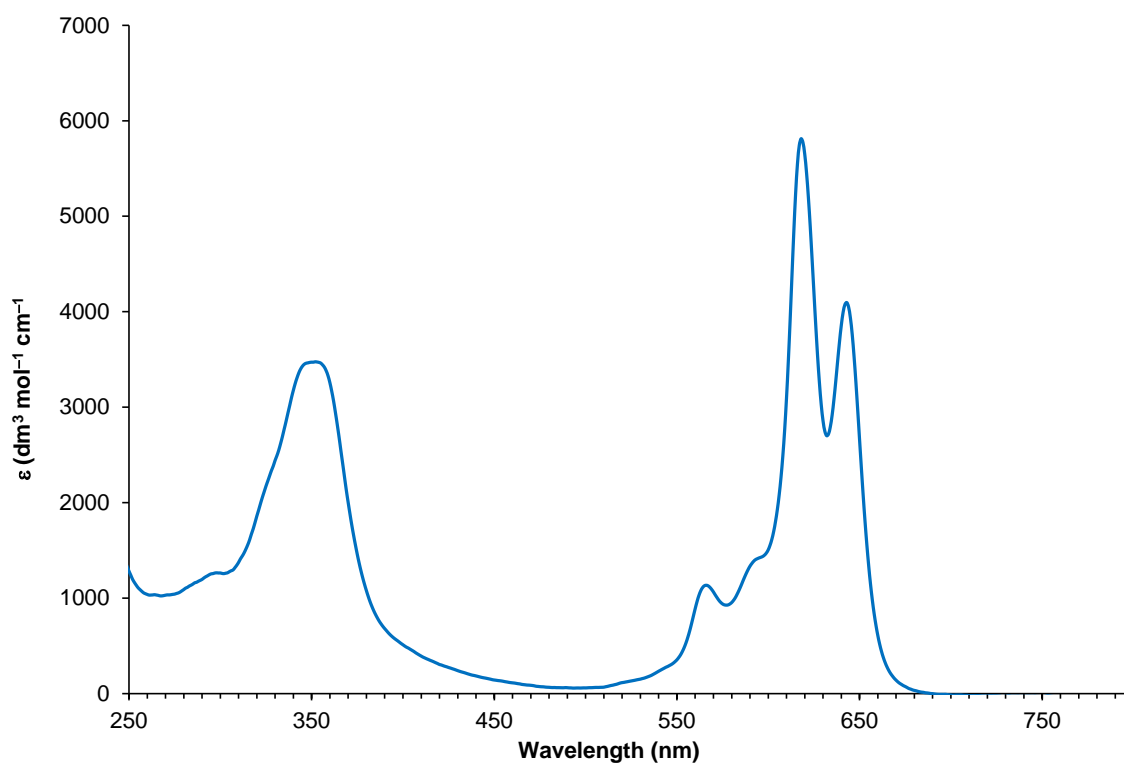

**Figure S10.** MS (MALDI-TOF, DCTB) of **4**.

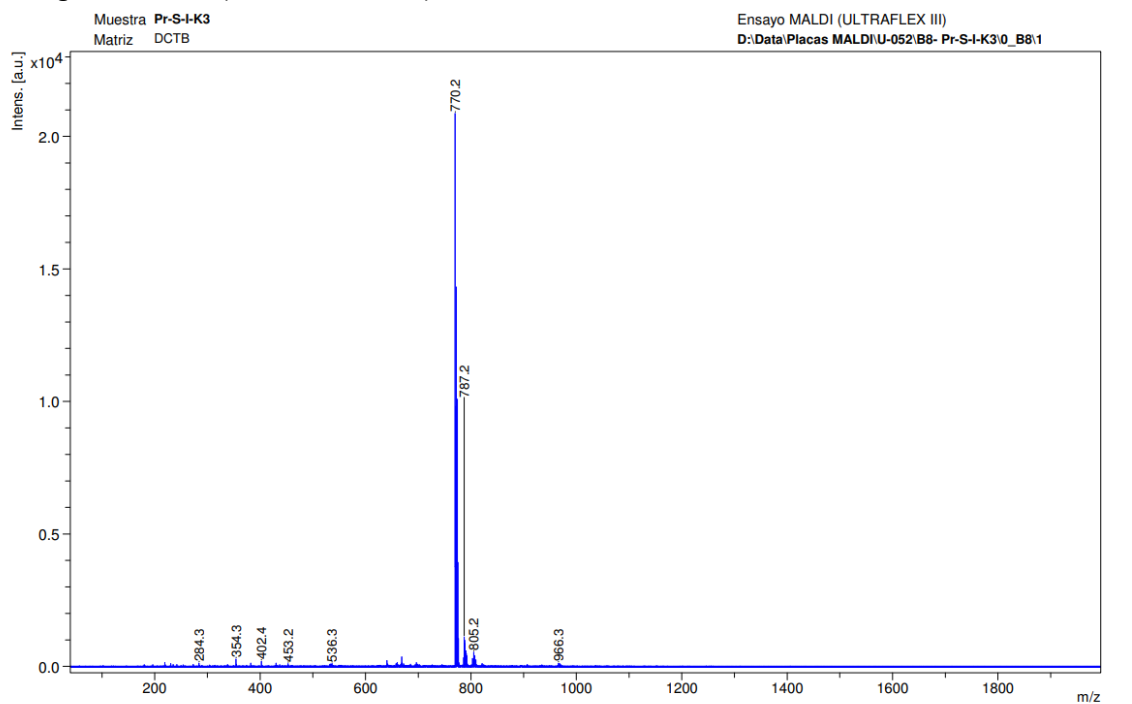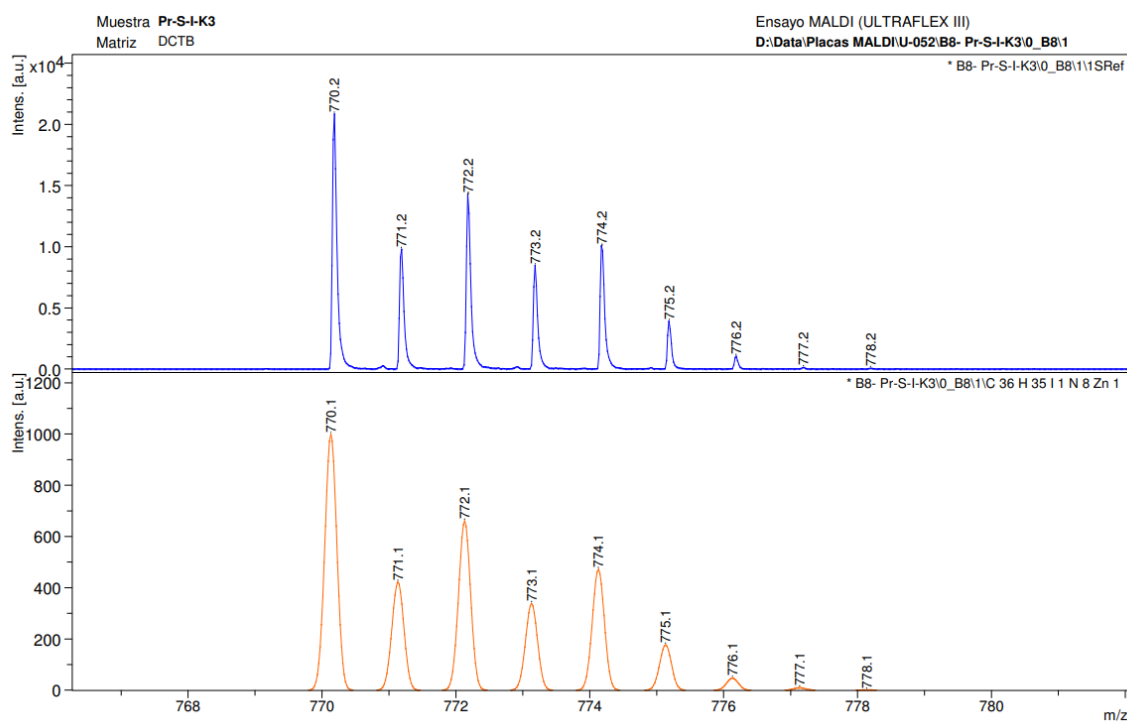

Zn(II) [2,3-12,13-dibenzo-7,8,17,18-tetrapropyl-porphyrinato] (5)

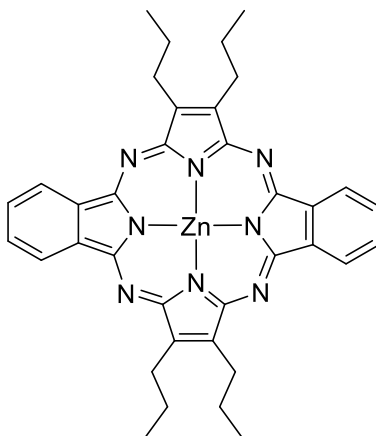

Figure S11. <sup>1</sup>H-NMR spectrum of 5 in THF-d<sub>4</sub>.

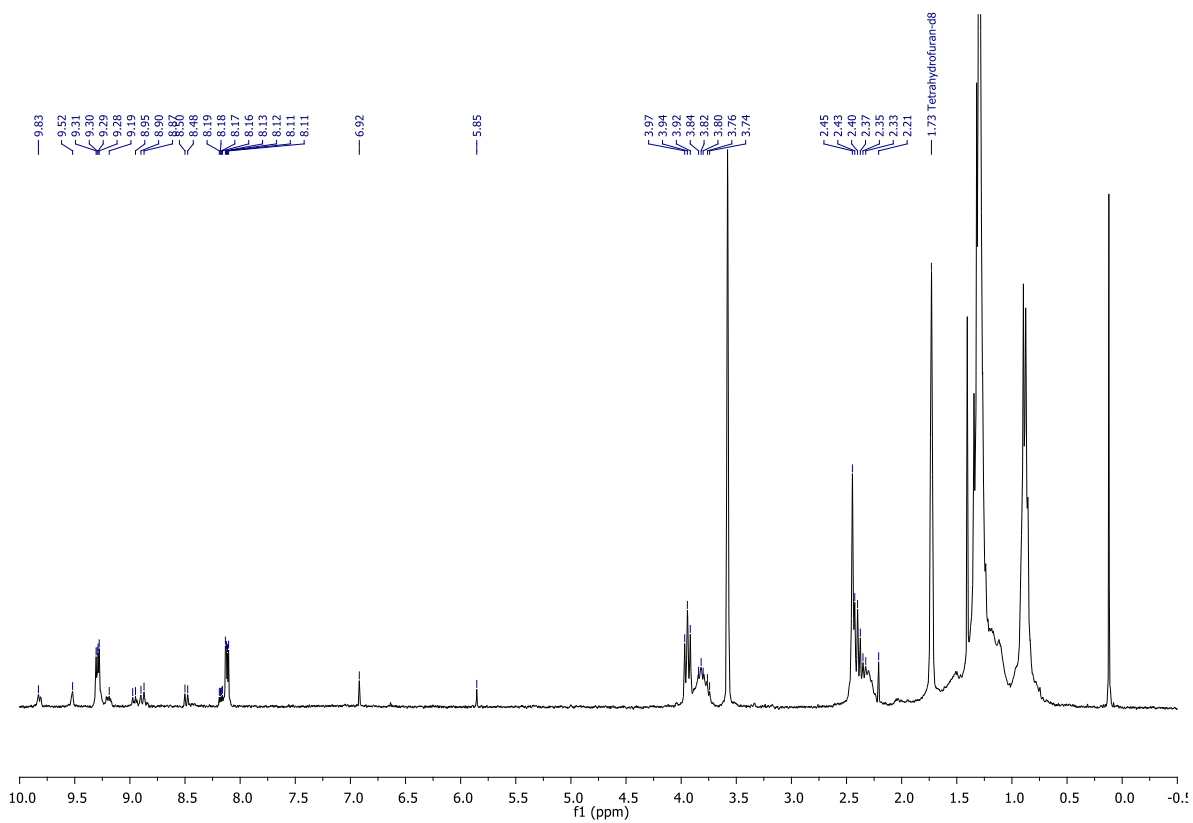

**Figure S12.** FTIR Spectrum (KBr) of **5**

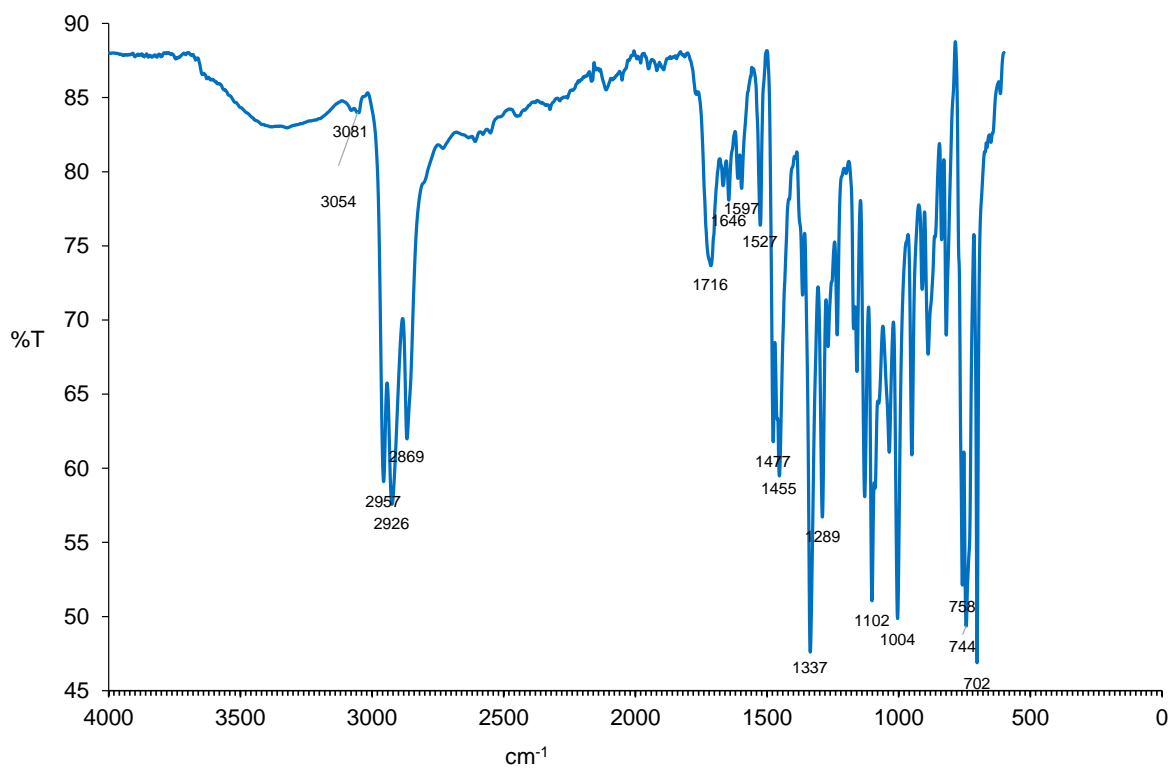

**Figure S13.** UV/Vis Spectrum in THF of **5**

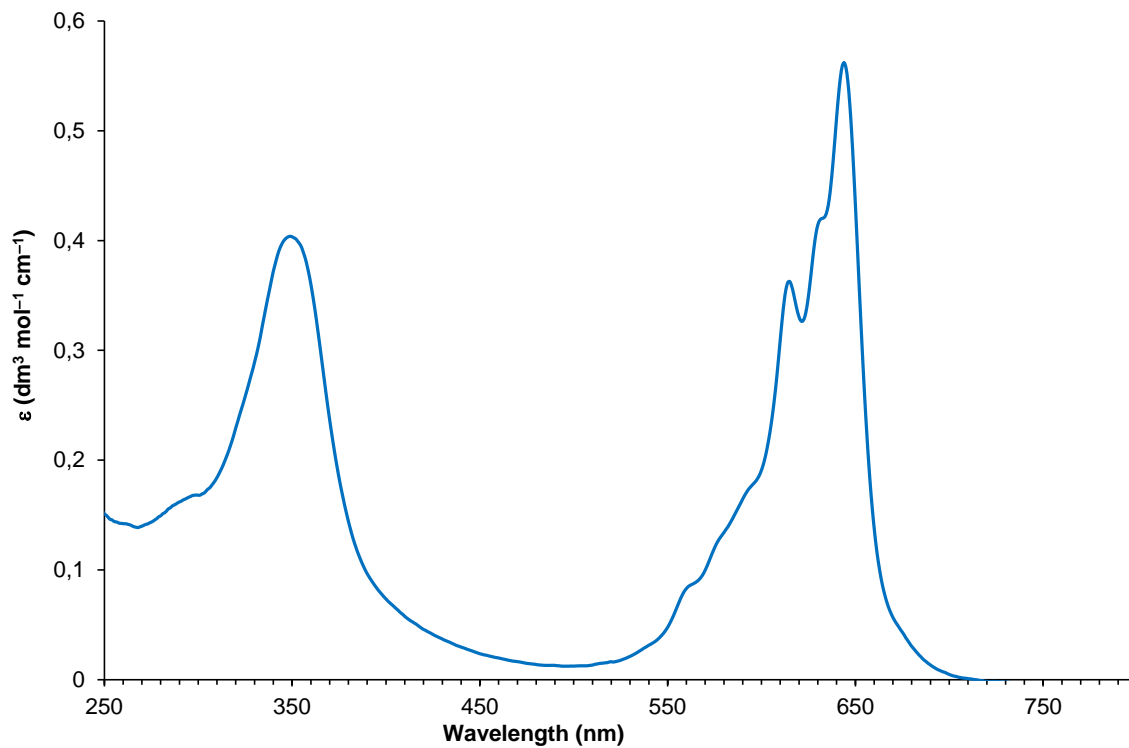

Figure S14. MS (MALDI-TOF, DCTB) of 5.

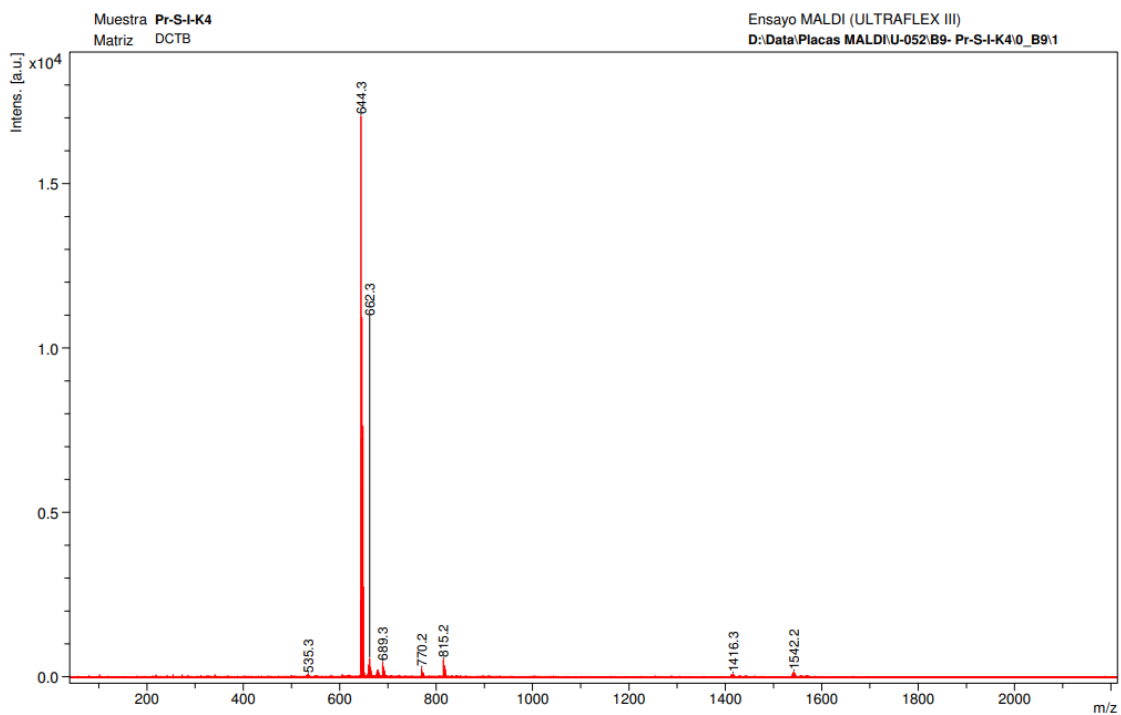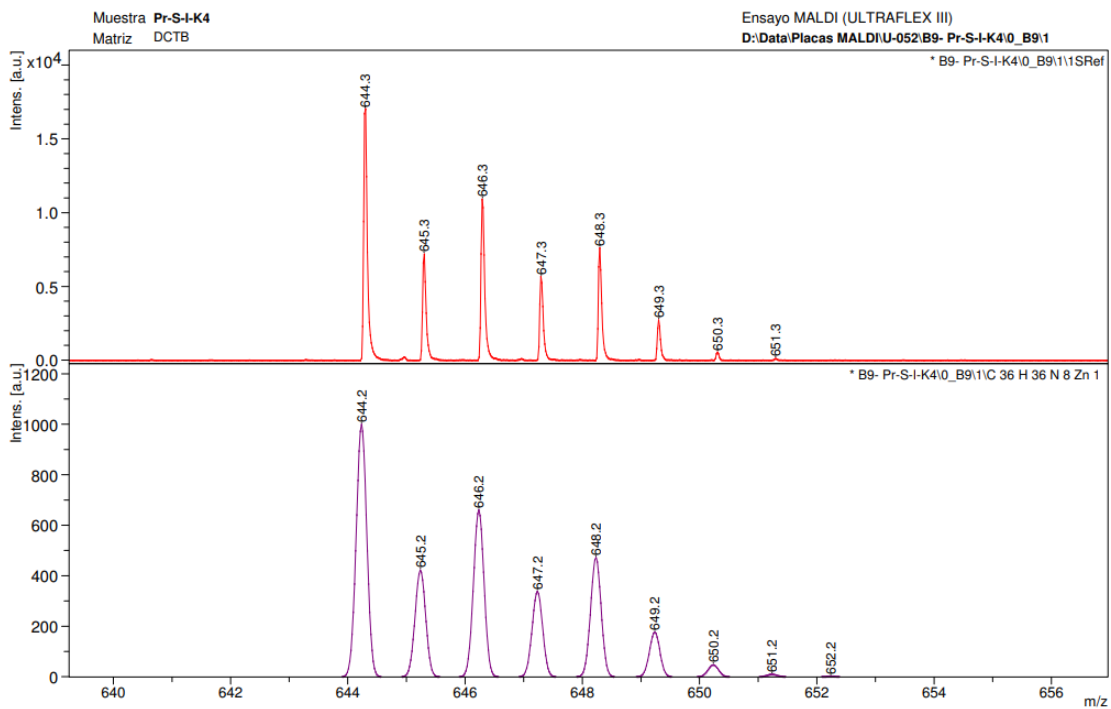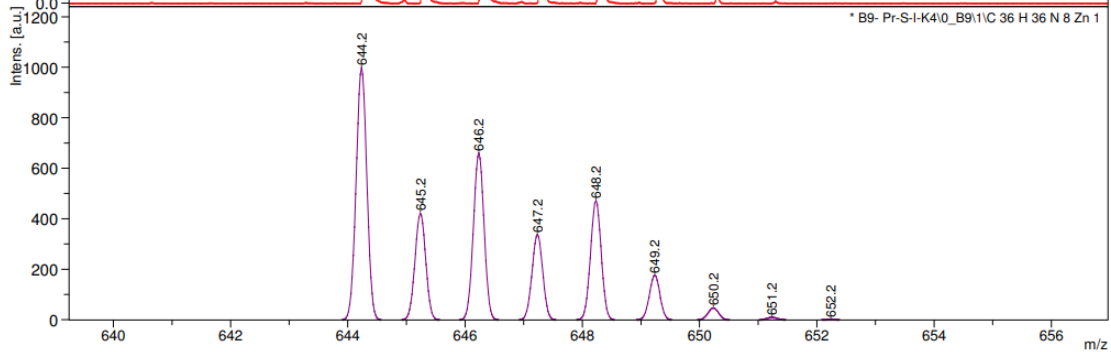

Zn(II) [2,3-(benzo-4'-ethynyltriisopropylsilane)-12,13-(benzo-4''(5'')-iodo)-7,8,17,18-tetrapropylporphyrinato] (6)

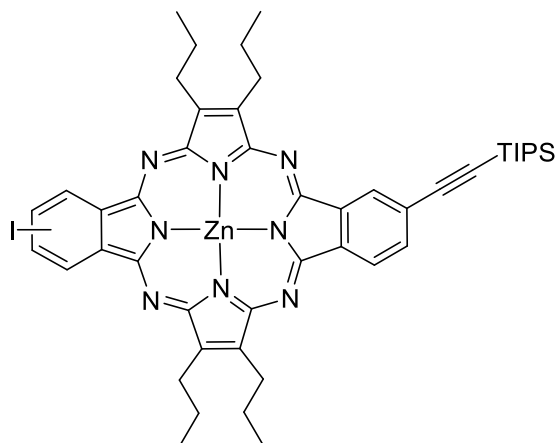

Figure S15.  $^{13}\text{C}$ -NMR spectrum of 6 in  $\text{CDCl}_3$ .

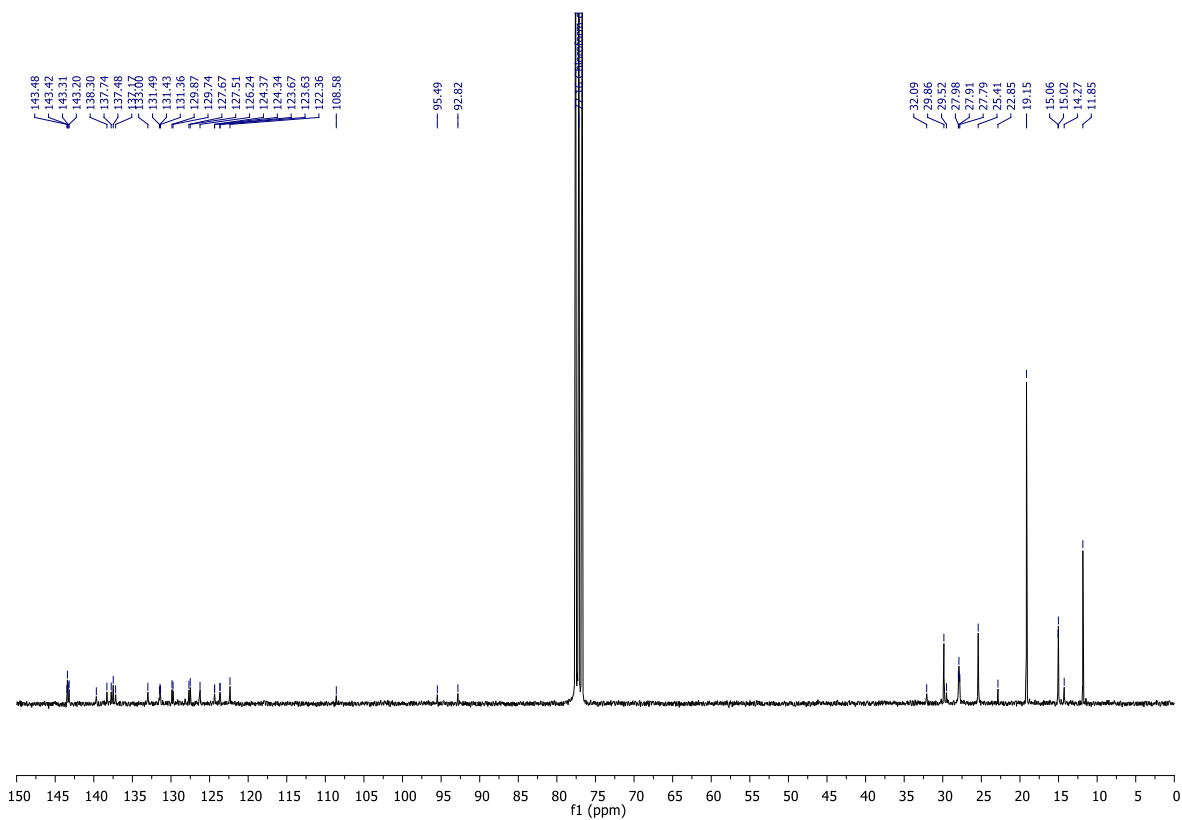

**Figure S16.** FT-IR (KBr) spectrum of **6**.

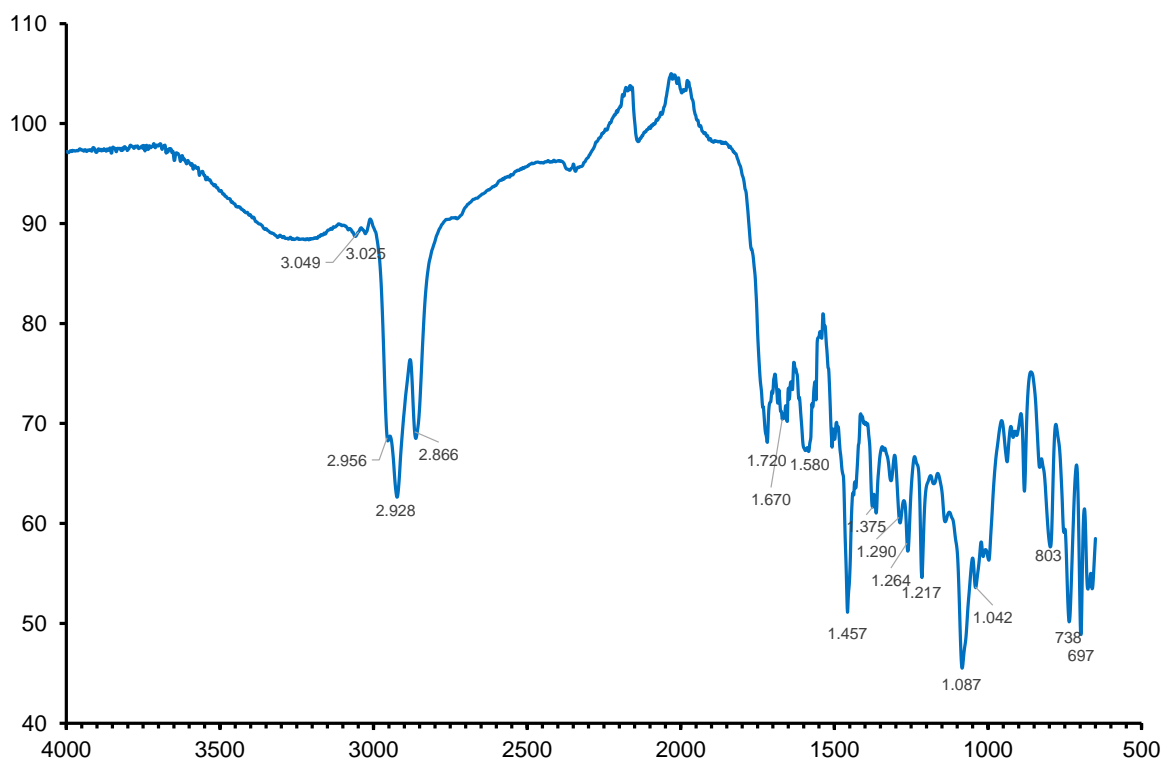

**Figure S17.** UV-Vis of **6** in  $\text{CHCl}_3$

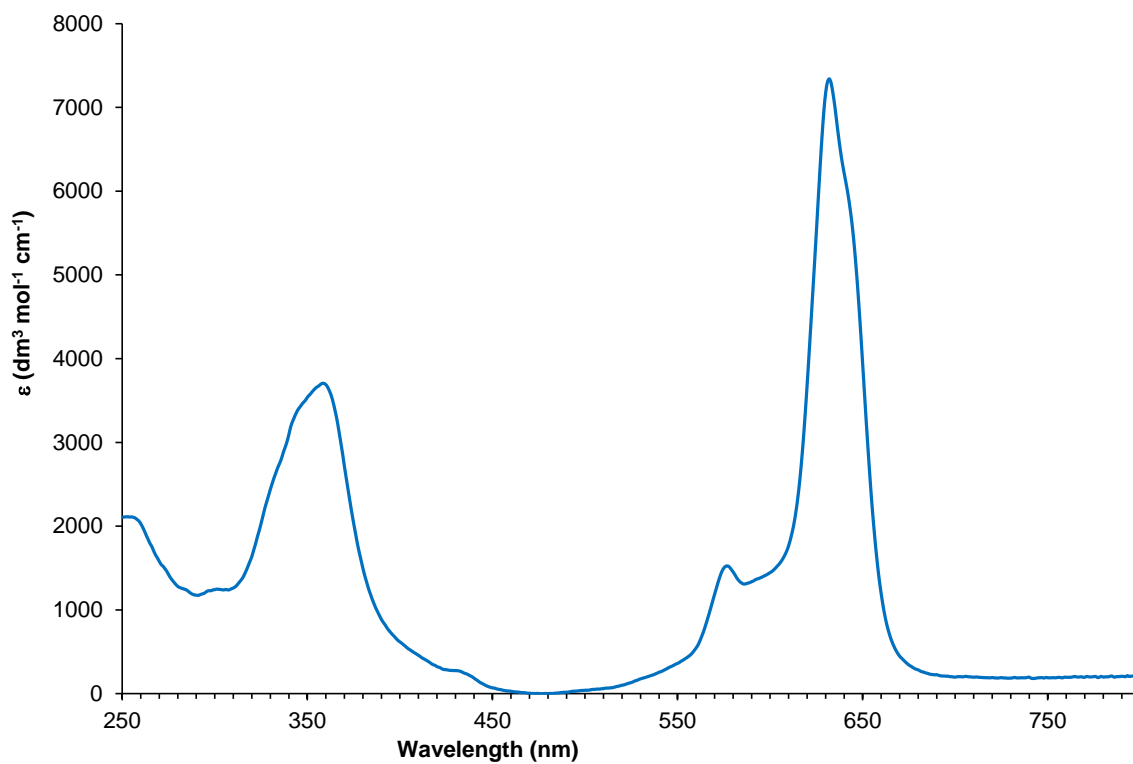



Figure S18. HRMS (APCI<sup>+</sup>) of 6.

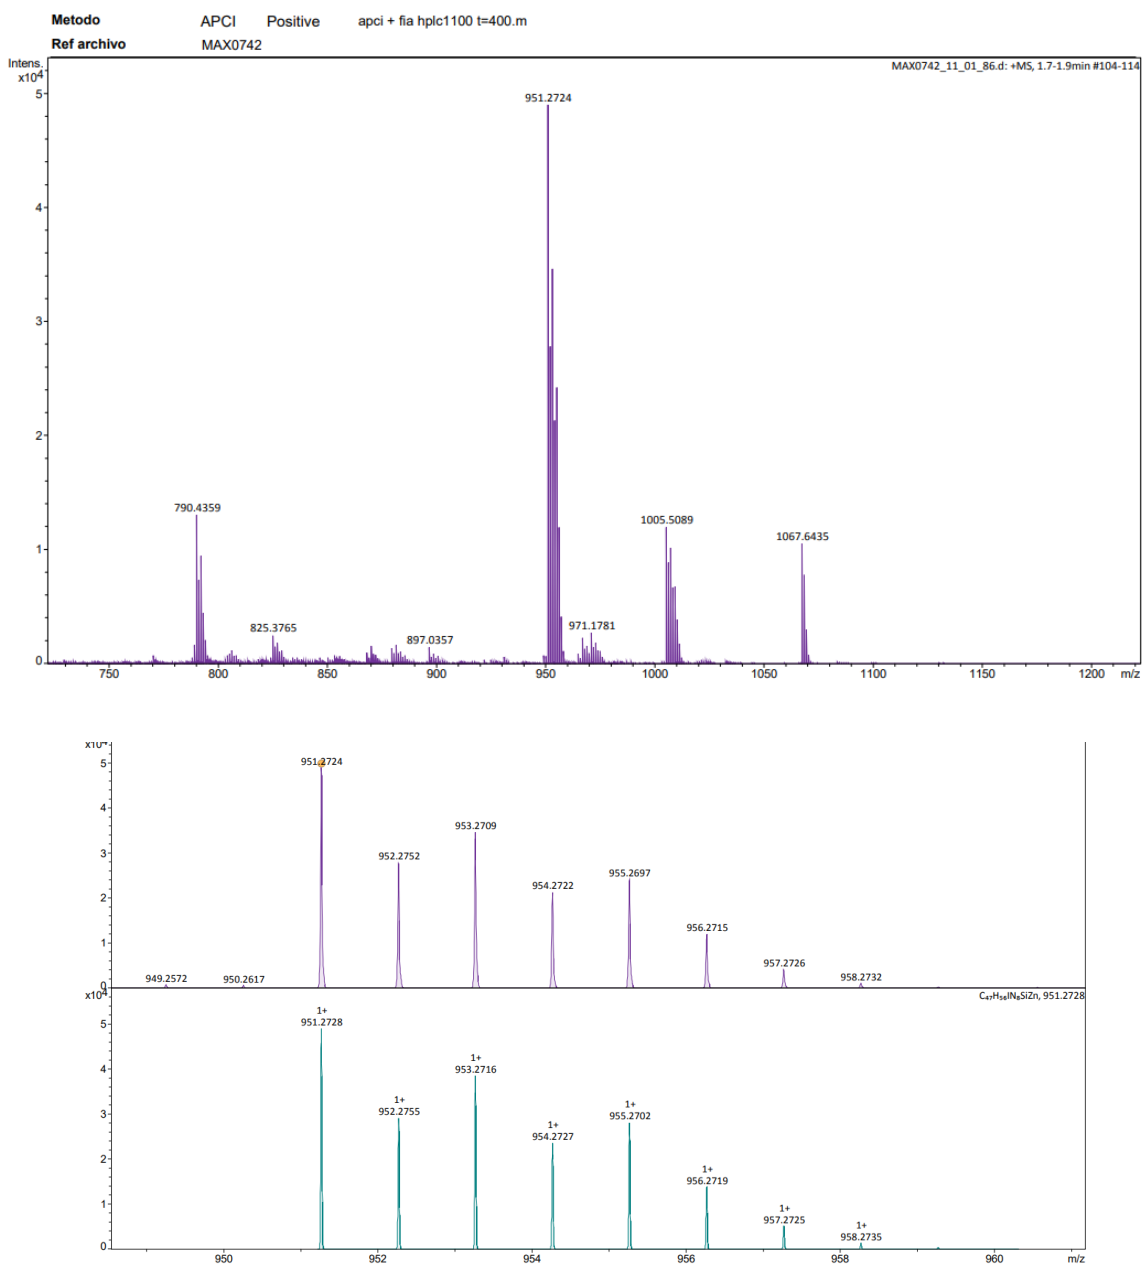

Zn(II) [2,3-12,13-bis(benzo-4'(5')-ethynyltriisopropylsilane)-7,8,17,18-tetrapropylporfirazinato] (7)

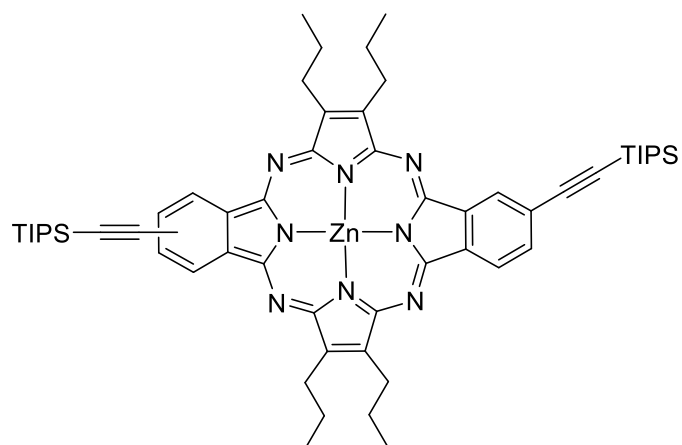

Figure S19.  $^1\text{H-NMR}$  spectrum of **7** in  $\text{CDCl}_3$ .

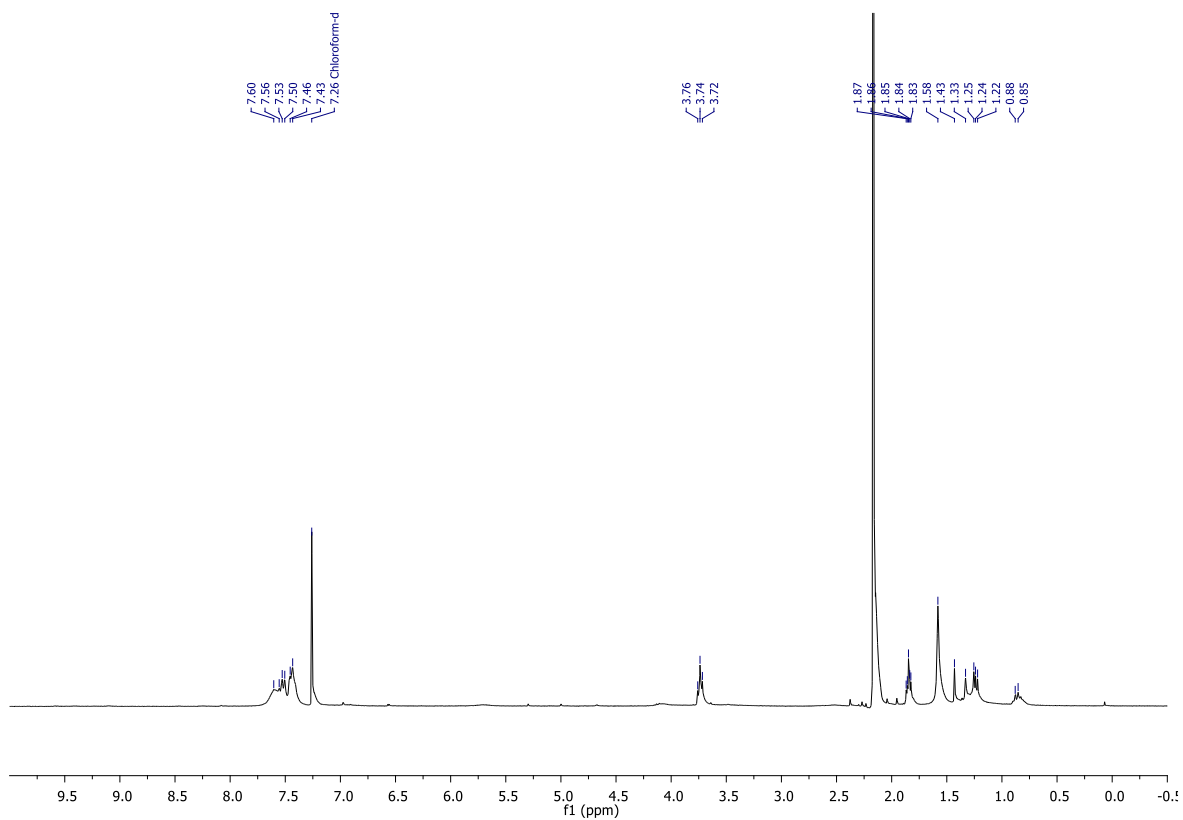

**Figure S20.** UV-Vis of **7** in CHCl<sub>3</sub>

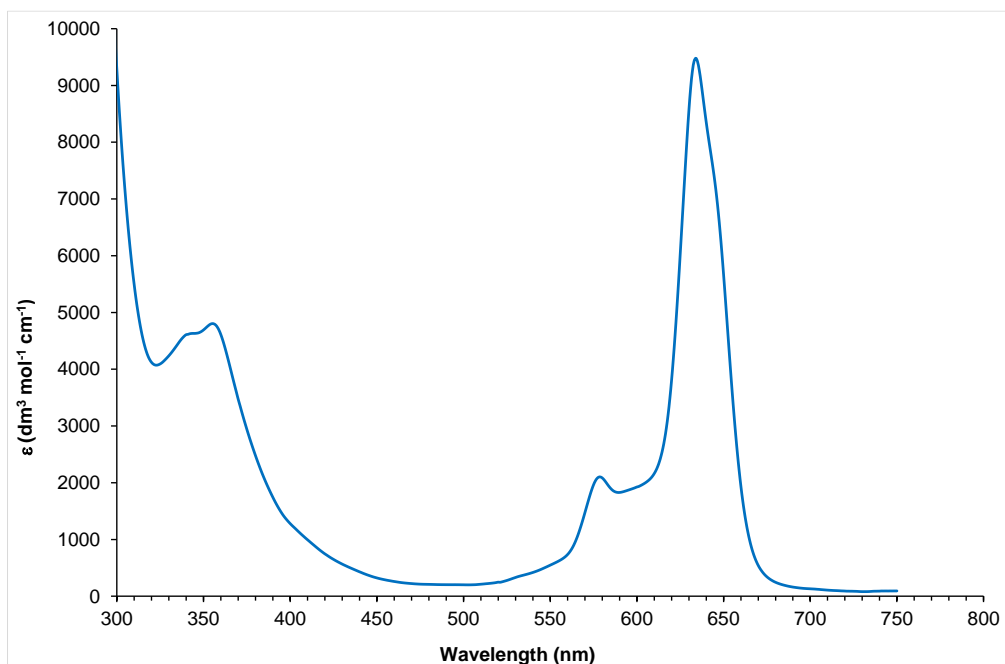

**Figure S21.** HRMS (APCI<sup>+</sup>) of **7**.

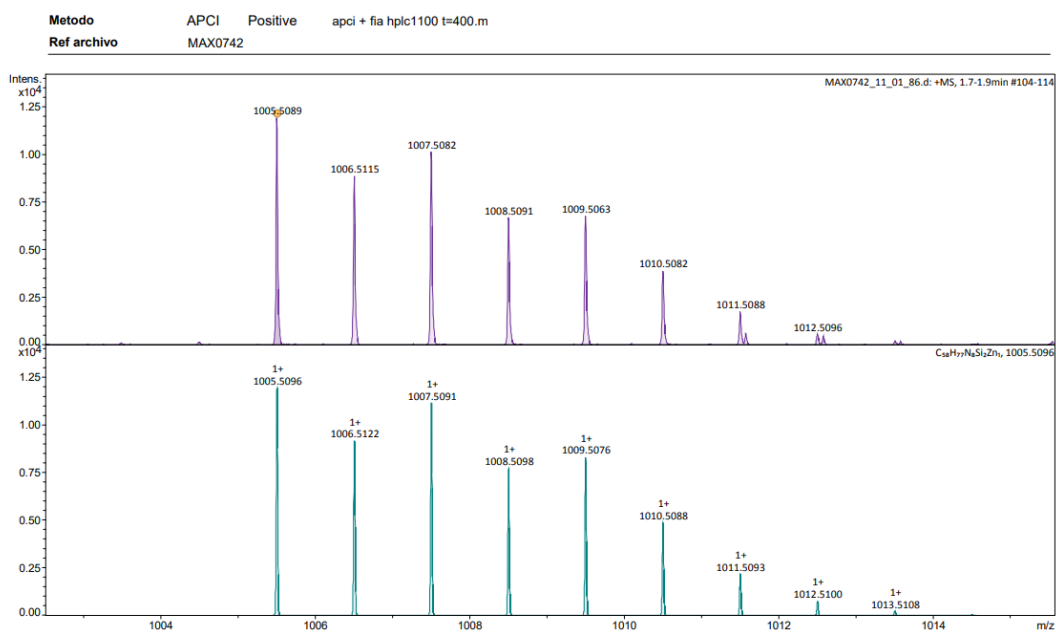

Zn(II) [2,3-(benzo-4'(5')-ethynyltriisopropylsilane)-12,13-(benzo-4''-bis(2',4'''-dihexoxybiphenyl-4-yl)amine)-7,8,17,18-tetrapropylporphyrinato] (9)

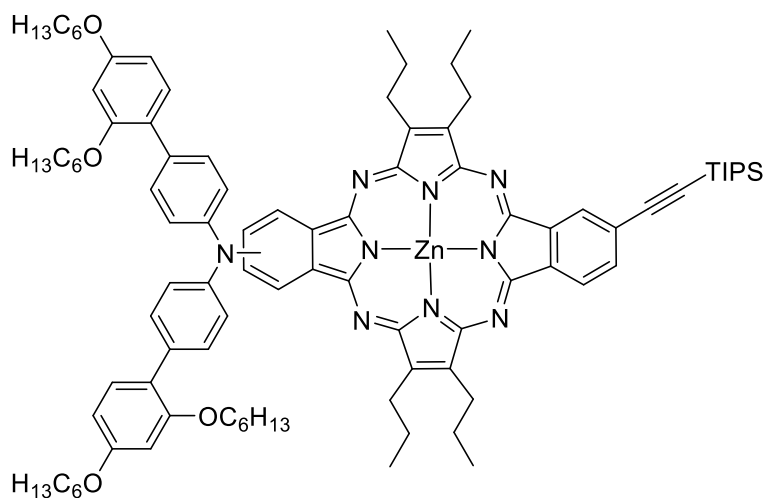

Figure S22.  $^1\text{H-NMR}$  spectrum of **9** in  $\text{CDCl}_3$ .

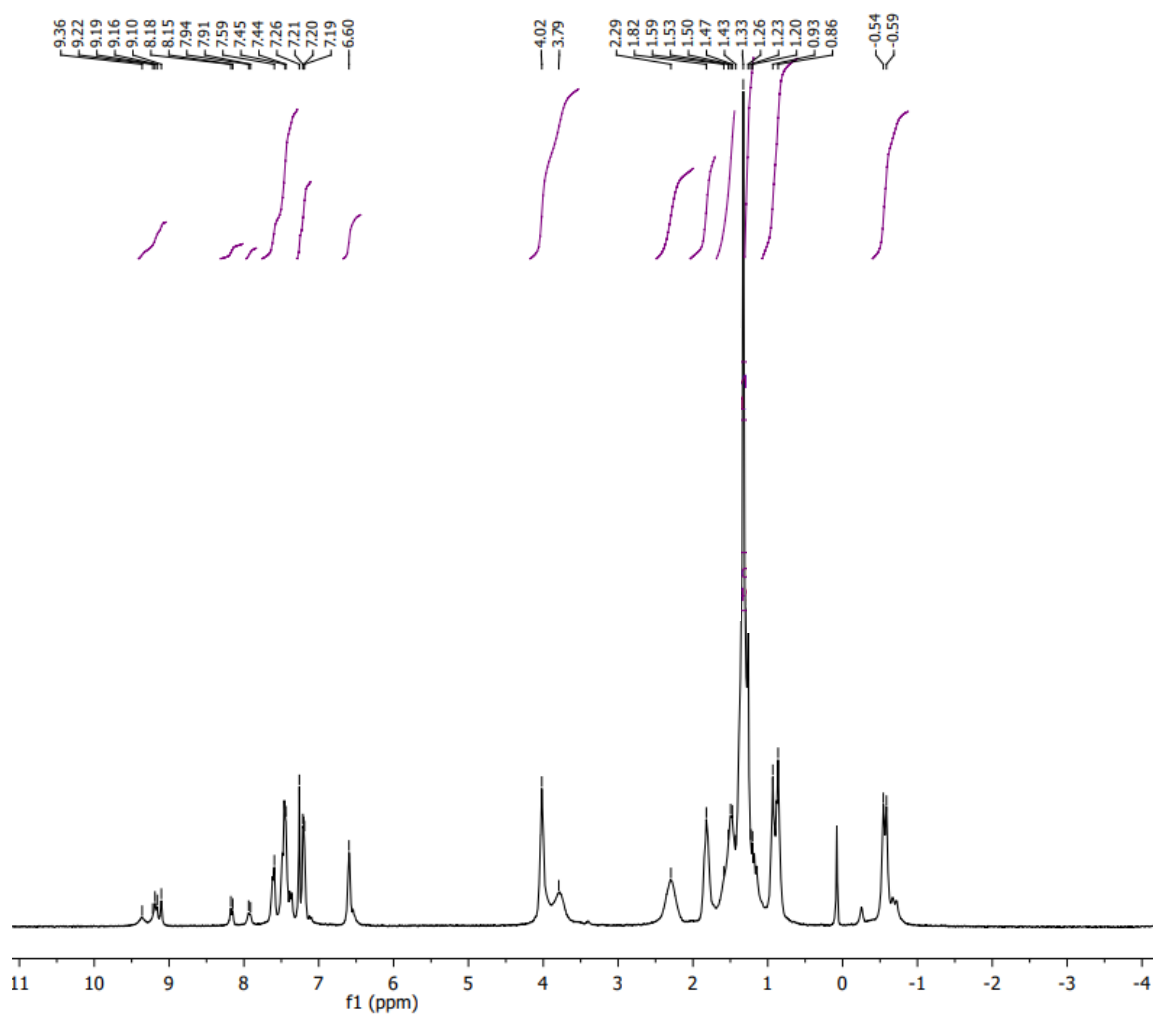

**Figure S23.** DEPT<sup>13</sup>C-NMR spectrum of **9** in CDCl<sub>3</sub>.

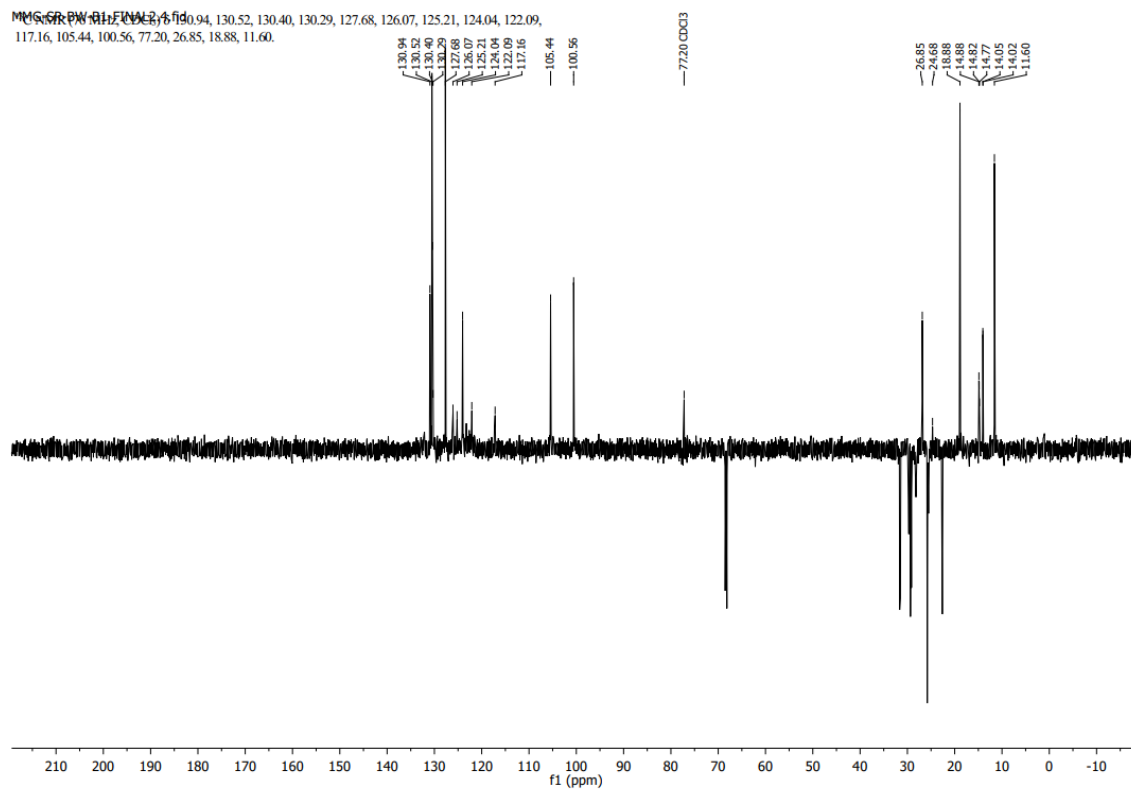

**Figure S24.** FT-IR (KBr) spectrum of **9**.

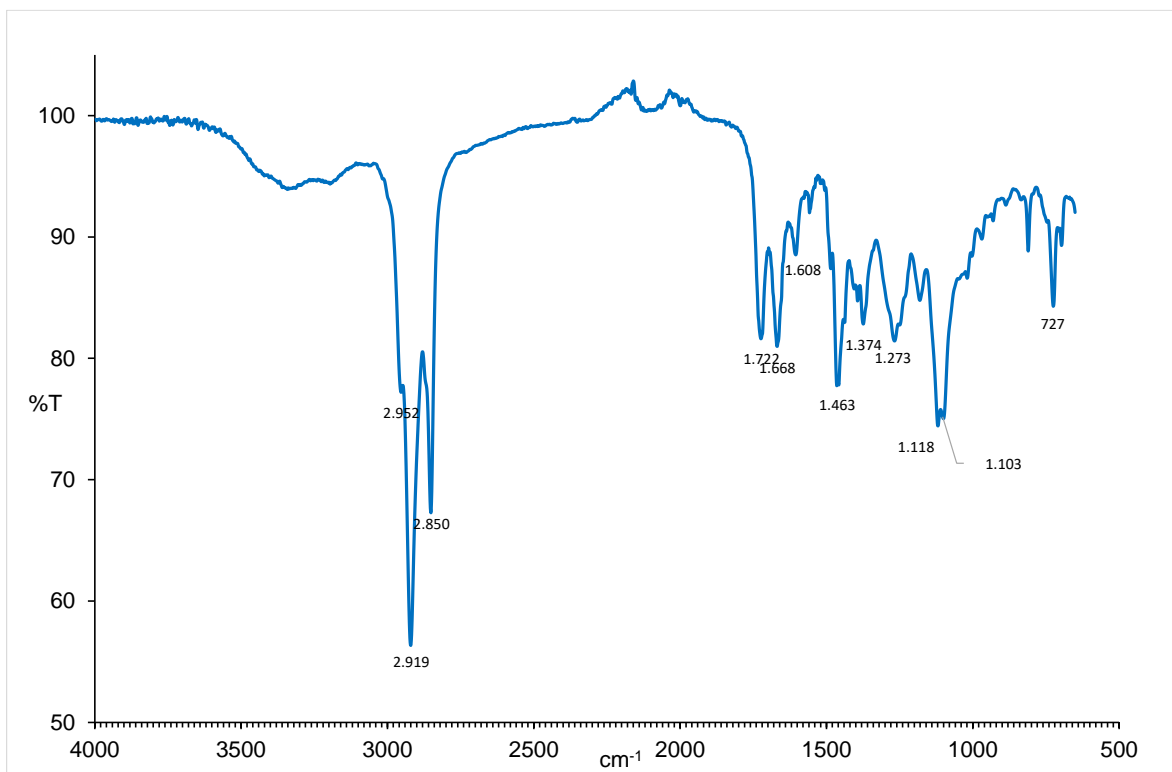

**Figure S25.** UV-Vis of **9** in CHCl<sub>3</sub>

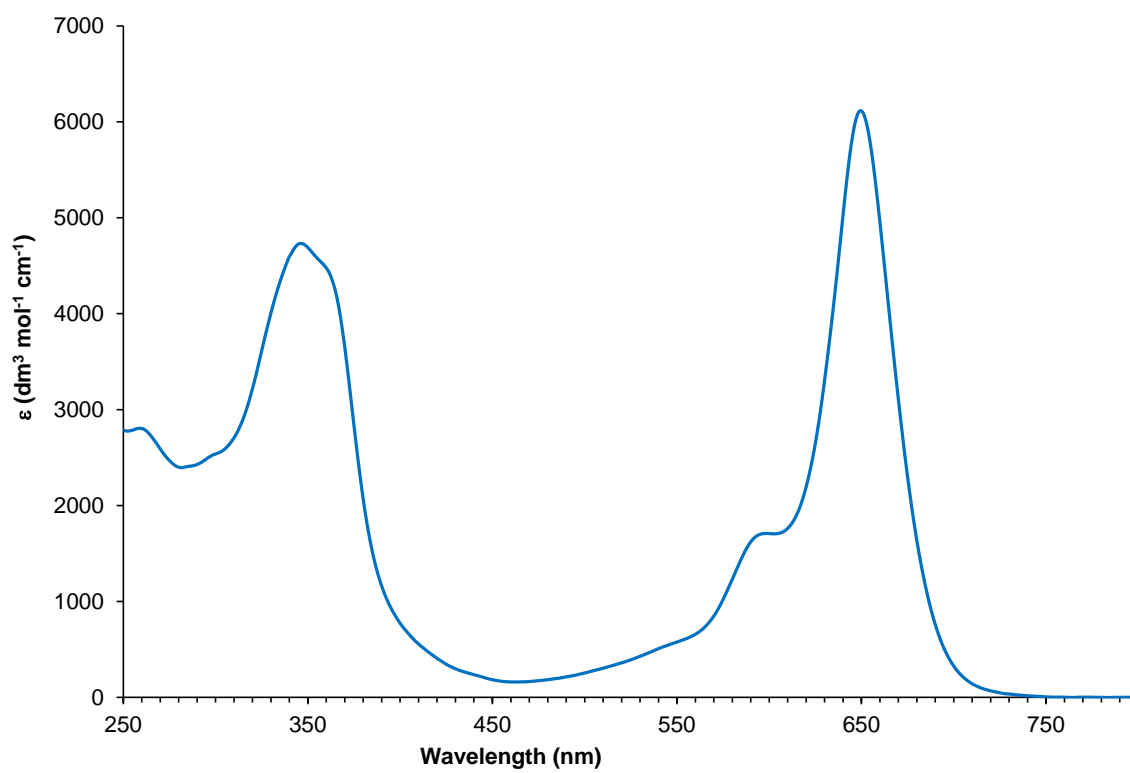

Figure S26. MS (MALDI-TOF, DCTB) of 9.

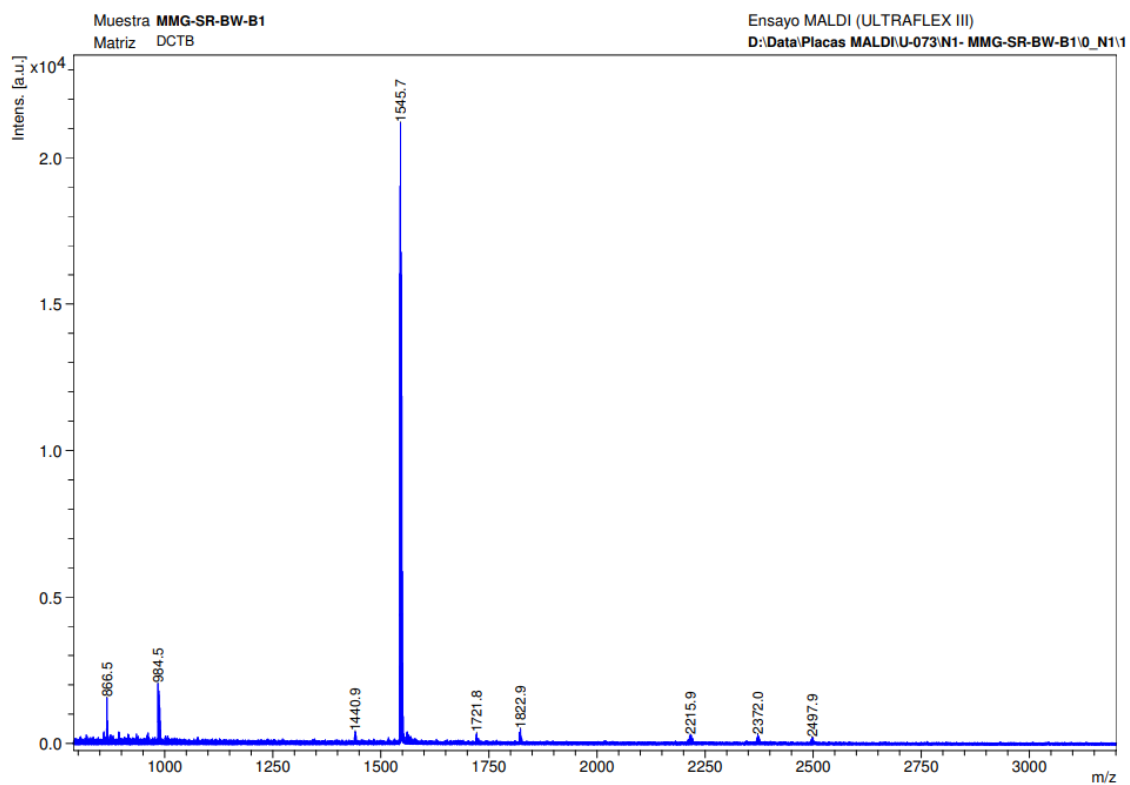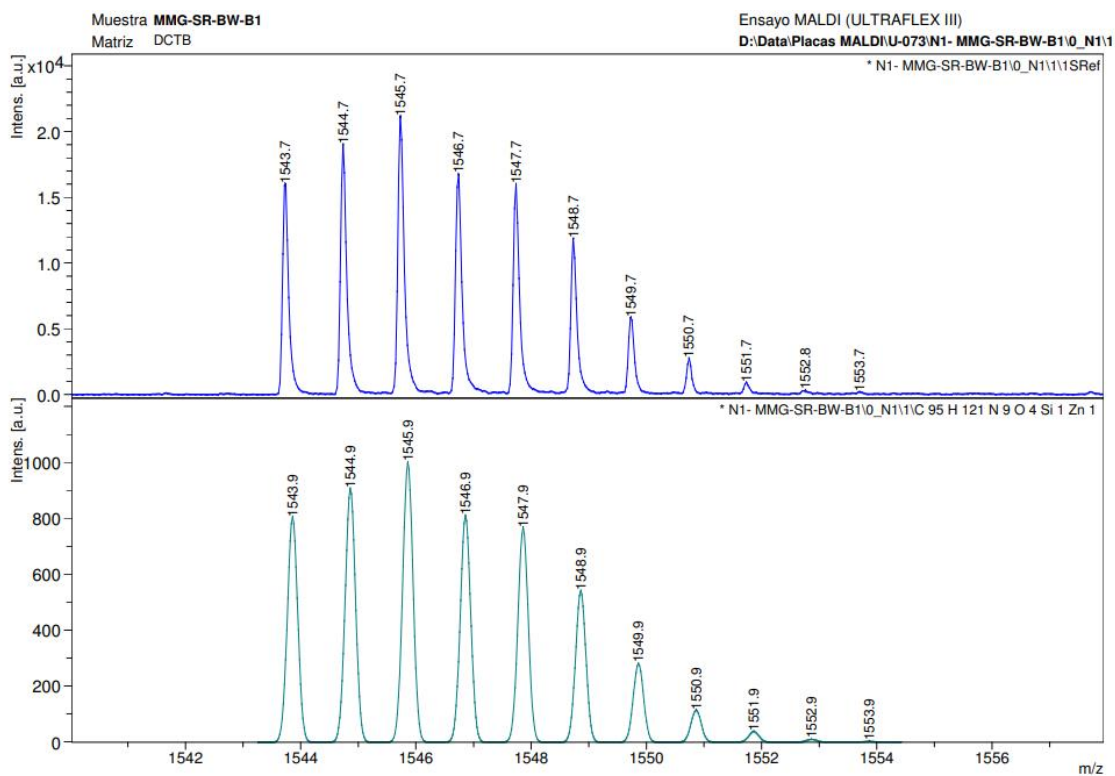

**Figure S27.** HRMS (DCTB + PEGNa 1500) of **9**.

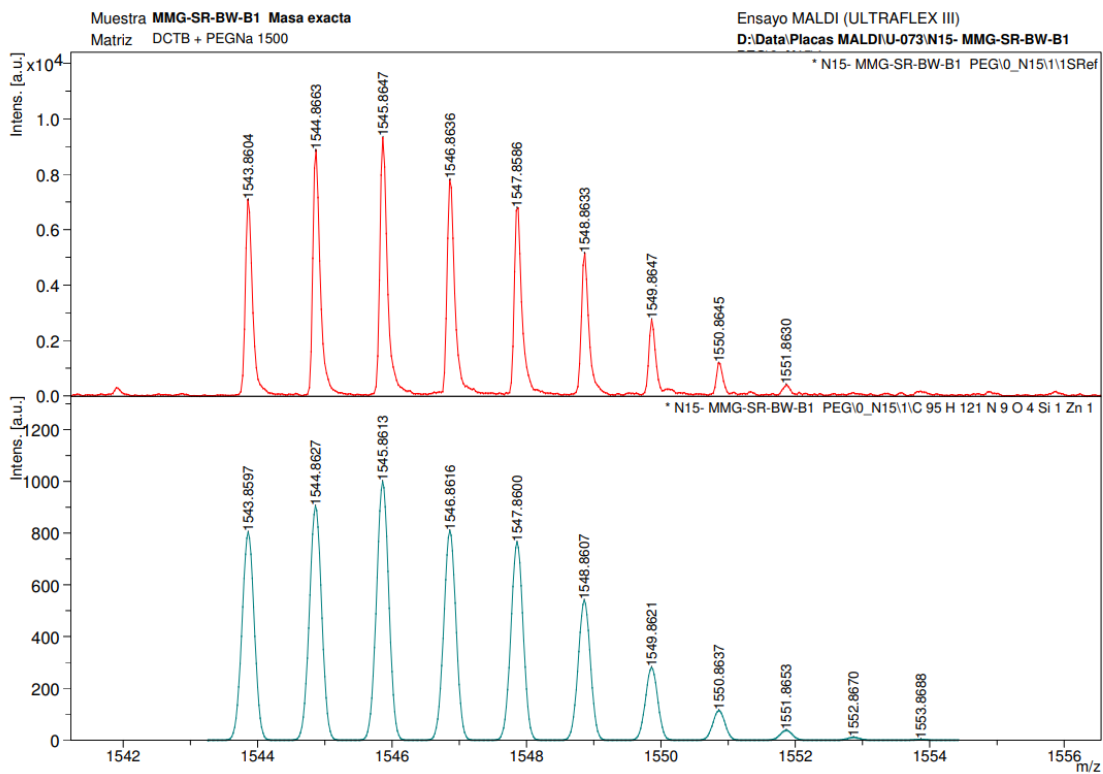



### Tetraazaporphyrin **11**

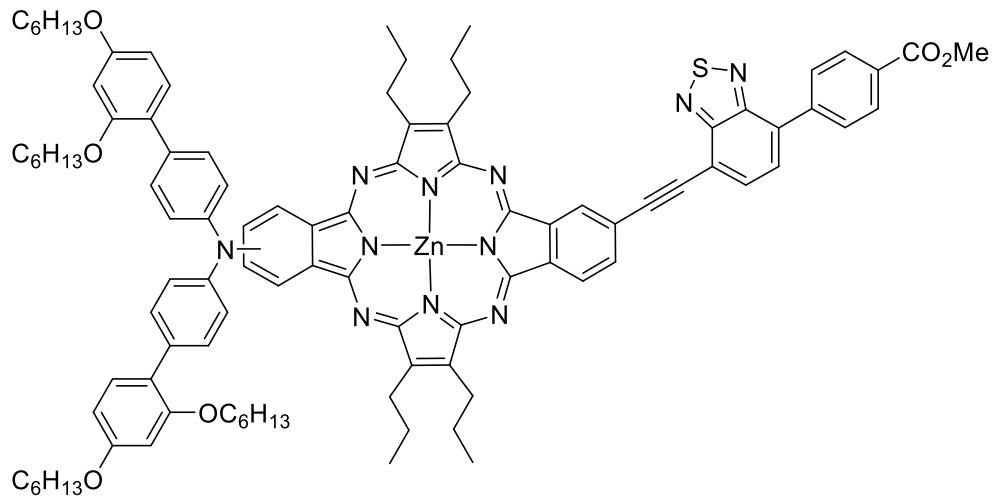

**Figure S28.**  $^1\text{H-NMR}$  spectrum of **11** in  $\text{CDCl}_3$ .

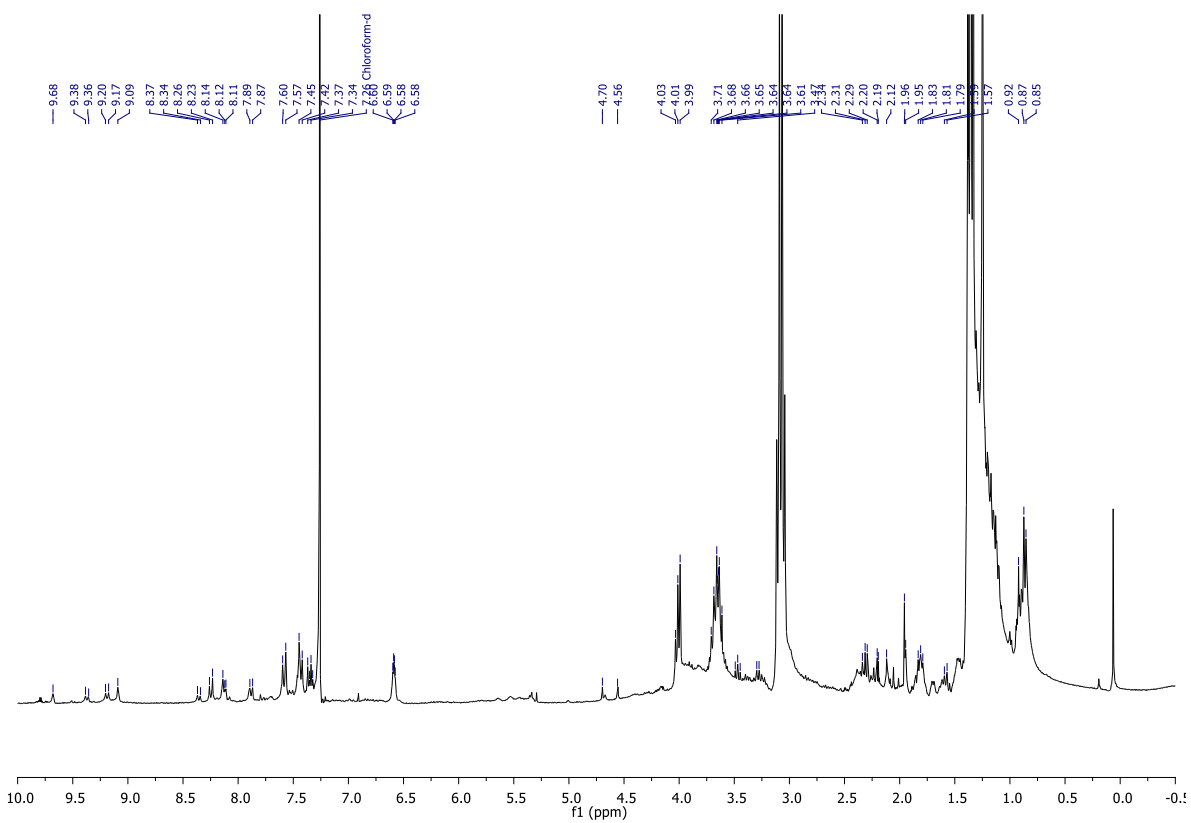

**Figure S29.** UV-Vis of **11** in  $\text{CHCl}_3$

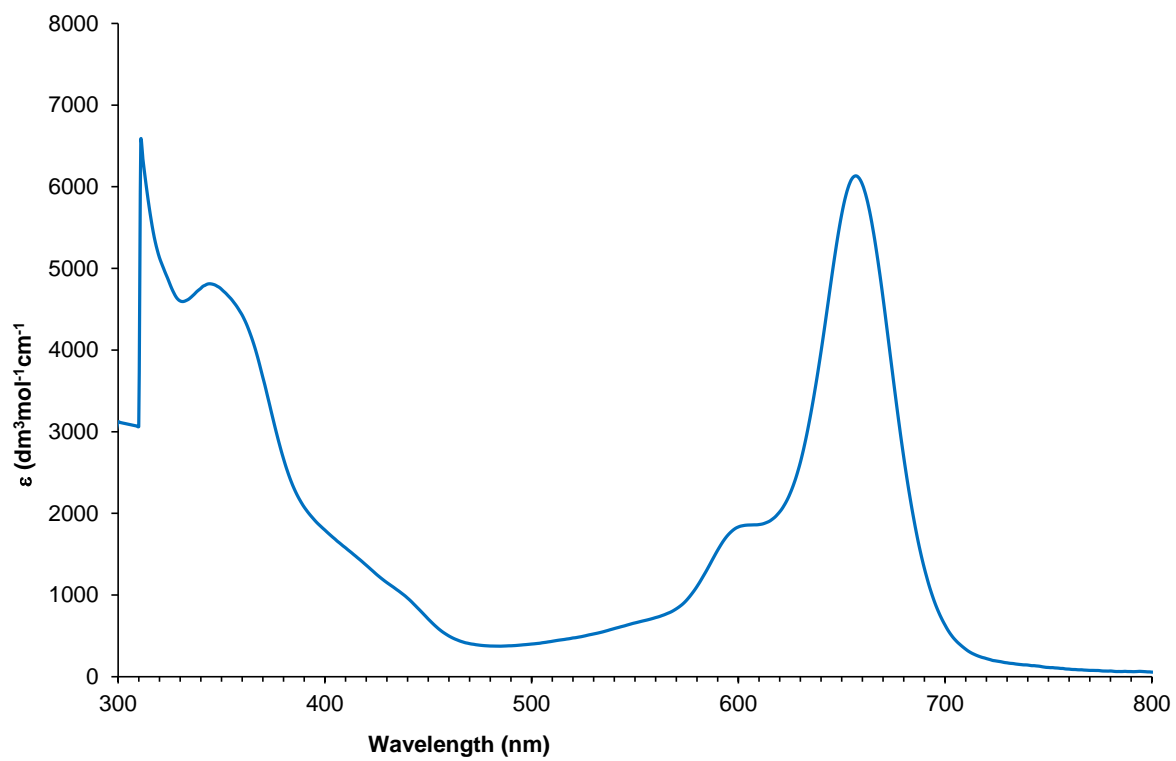

Figure S30. MS (MALDI-TOF, DCTB) of 11.

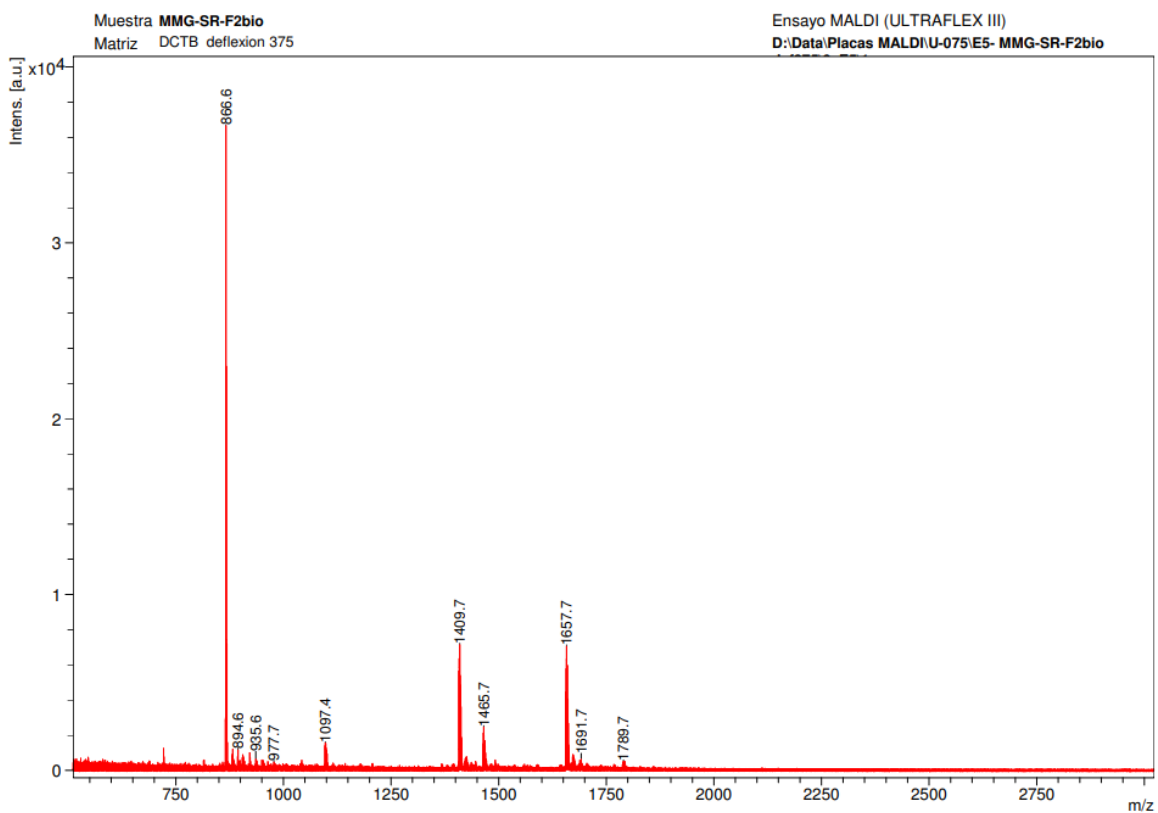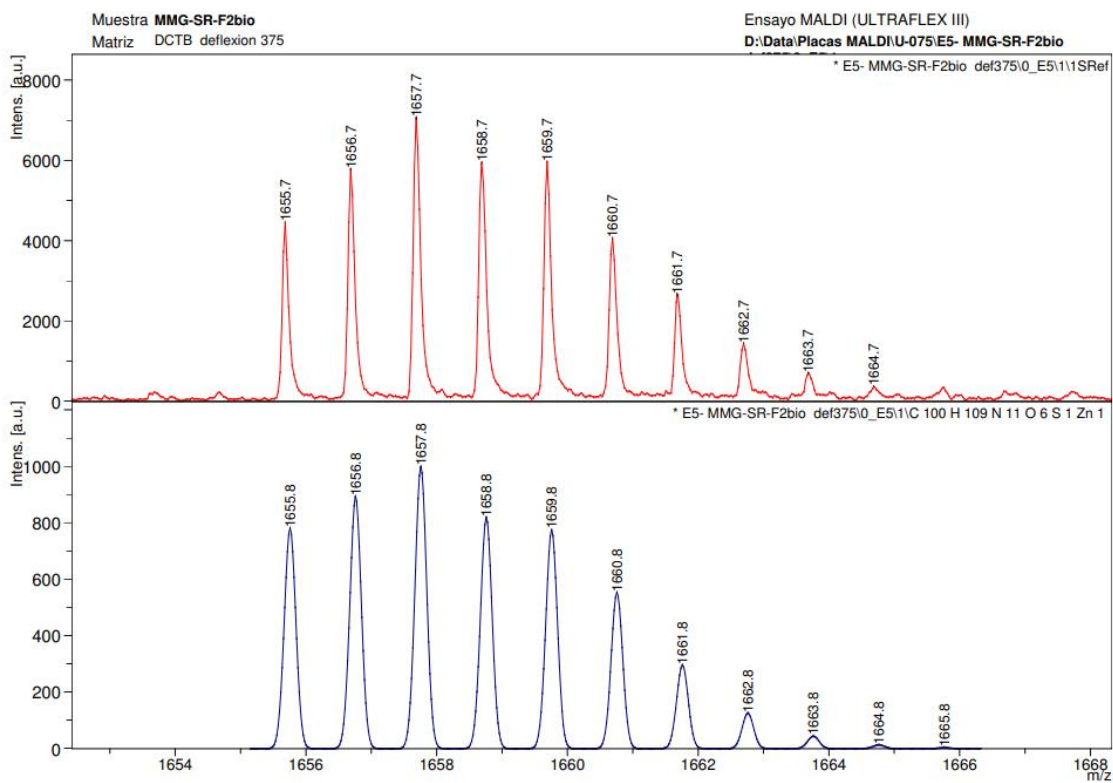

### Tetraazaporphyrin **12**

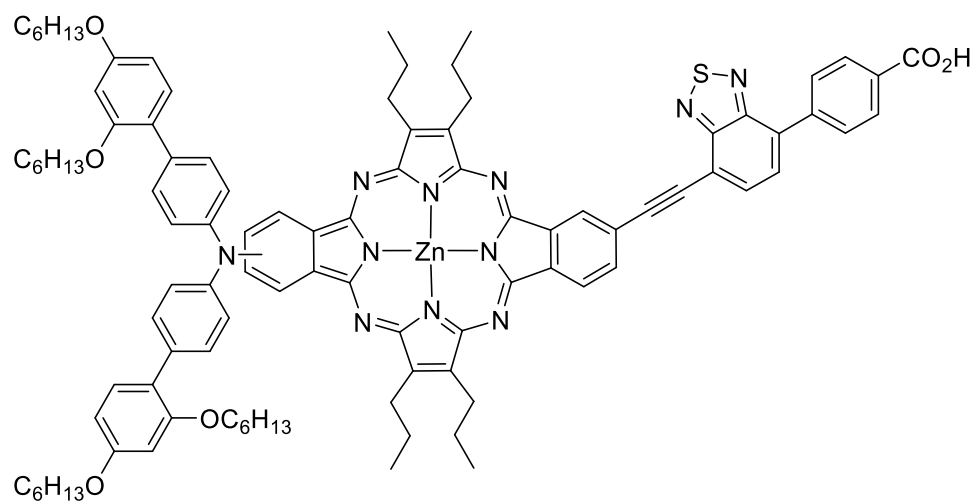

**Figure S31.** FT-IR spectrum of **12** in KBr.

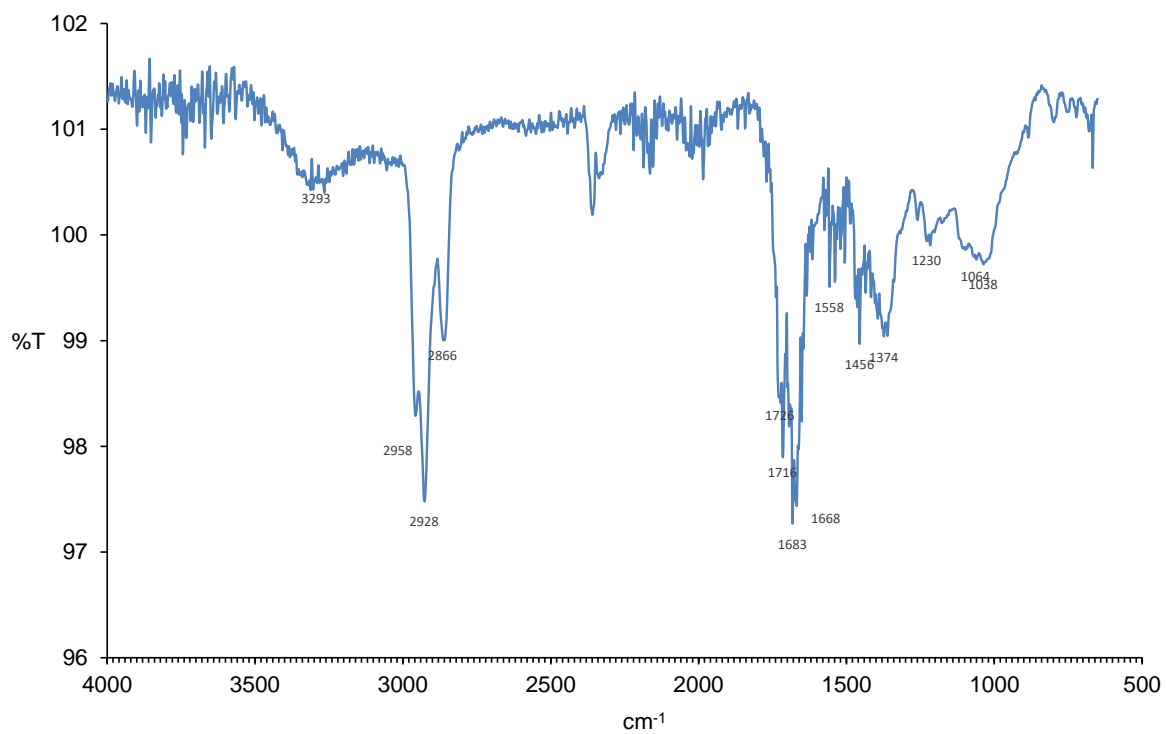

**Figure S32.** UV-Vis Spectrum of **12** in CHCl<sub>3</sub>

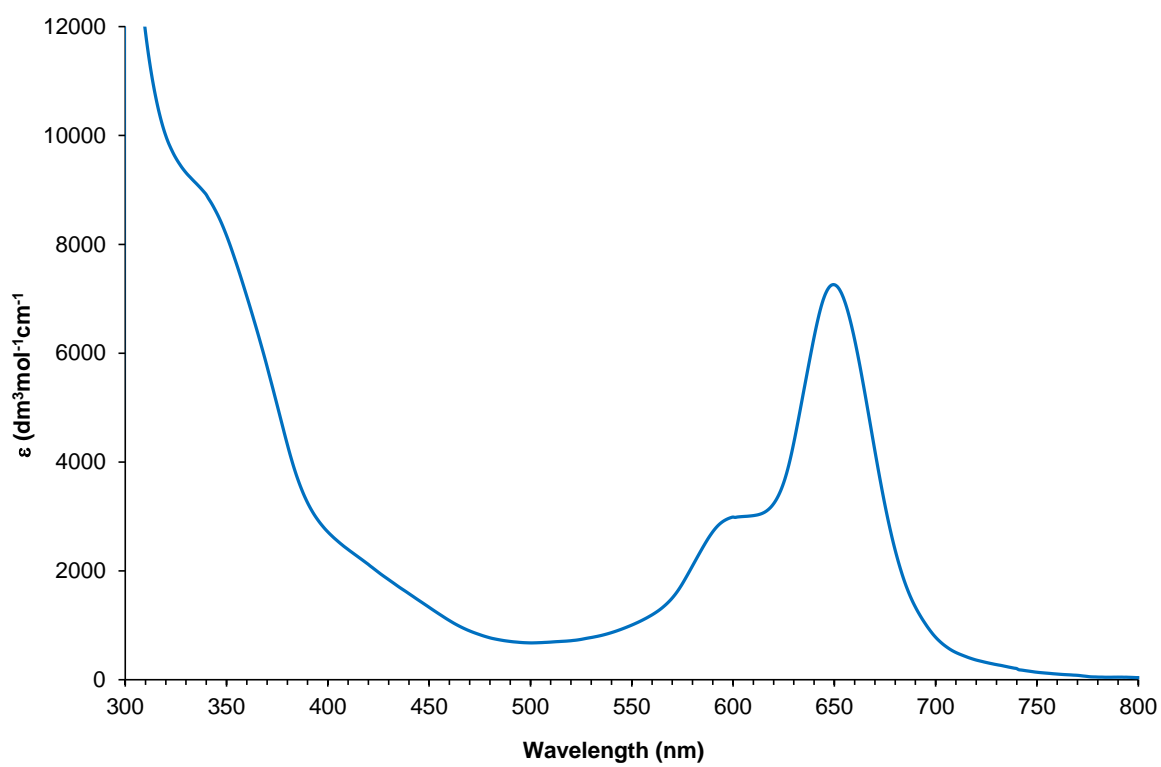



**Figure S34.** HRMS (MALDI-TOF, DCTB + PPG2000) of **12**.

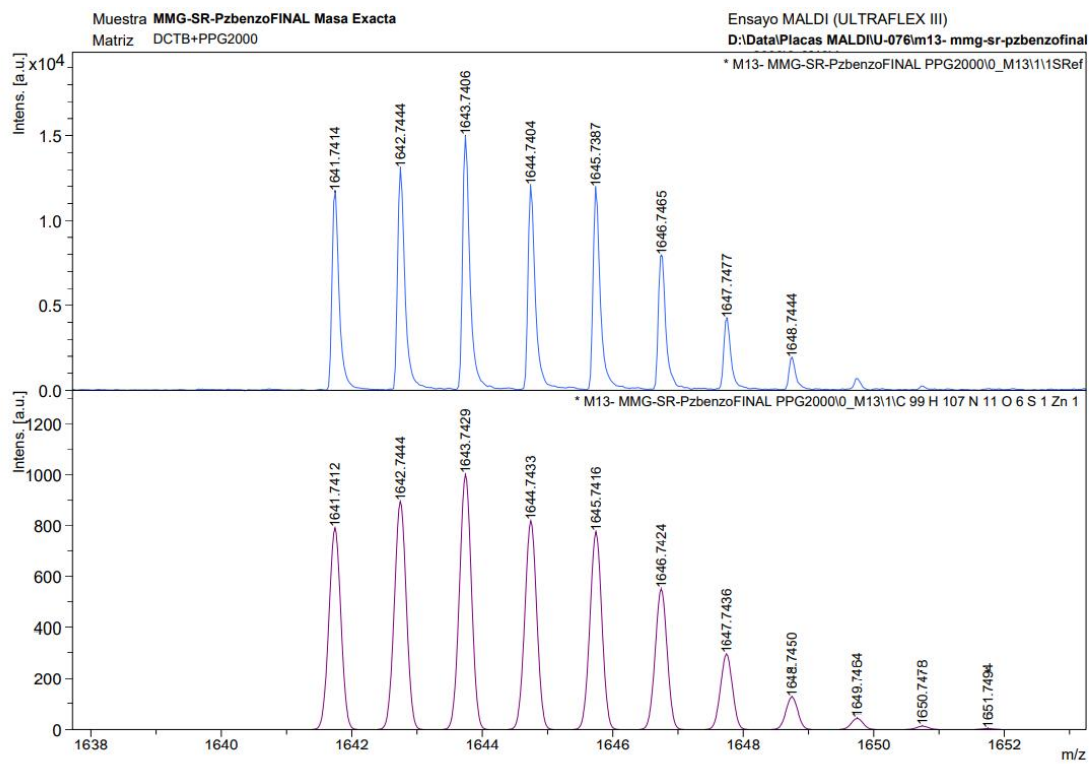

Supplement: d1tc00990g1.pdf [file d1tc00990g1.pdf]
